# Supplementary material for: Organotin Schiff bases as halofluorochromic dyes: green synthesis, chemio-photophysical characterization, DFT, and their fluorescent bioimaging in vitro
Source: Royal Society of Chemistry journal article supplement (doi:10.1039/d1tb01405f), 2021-01-01
Supplement: d1tb01405f1.pdf [file d1tb01405f1.pdf]

## Electronic Supplementary Information for

### Organotin Schiff bases as Halofluorochromic dyes: Green synthesis, chemio-photophysical characterization, DFT, and their fluorescent bioimaging *in vitro*

Margarita López-Espejel,<sup>a</sup> Alberto Gómez-Treviño,<sup>a</sup> Blanca M. Muñoz-Flores,<sup>a</sup> Manuel A. Treto-Suarez,<sup>b,c</sup> Eduardo Schott,<sup>b,c</sup> Dayán Páez-Hernández,<sup>d,e</sup> Ximena Zarate,<sup>f,\*</sup> and Víctor M. Jiménez-Pérez.<sup>a,\*</sup>

#### Table of contents

|                 | Page                                                                                                                                                                                                                                                                                                                                                                         |
|-----------------|------------------------------------------------------------------------------------------------------------------------------------------------------------------------------------------------------------------------------------------------------------------------------------------------------------------------------------------------------------------------------|
| <b>Table S1</b> | Reaction time and yields by two synthetic routes of <b>1-8</b> . <span style="float: right;"><b>5</b></span>                                                                                                                                                                                                                                                                 |
| <b>Table S2</b> | Crystal data for compound <b>1</b> <span style="float: right;"><b>6</b></span>                                                                                                                                                                                                                                                                                               |
| <b>Table S3</b> | Emission data of compounds <b>1-8</b> at different pH values. <span style="float: right;"><b>7</b></span>                                                                                                                                                                                                                                                                    |
| <b>Table S4</b> | Structural parameters obtained through X-ray diffraction structure ( <b>1<sub>c</sub></b> ) and theoretically calculated ( <b>1A<sup>0</sup><sub>Theo</sub></b> ) to compound <b>1</b> . Where $\alpha$ and $\gamma$ are bond angles in °, and $d$ is the bond lengths in Å. <span style="float: right;"><b>41</b></span>                                                    |
| <b>Table S5</b> | Torsion angle $\gamma(C_7-N_1-C_8-C_9)$ and bond lengths $d(Sn-O_2)$ (in Å). <span style="float: right;"><b>43</b></span>                                                                                                                                                                                                                                                    |
| <b>Table S6</b> | Singlet→Singlet absorption data in compounds <b>1</b> and <b>2</b> in the neutral ( <b>A<sup>0</sup></b> ), basic ( <b>B<sup>-</sup></b> ), and acid ( <b>C<sup>+</sup></b> and <b>D<sup>+</sup></b> ) media considering the solvent effect (Aqueous Solutions, $\epsilon=58.5$ , and refraction=1.33). <span style="float: right;"><b>43</b></span>                         |
| <b>Table S7</b> | Singlet→Singlet emission data in compounds <b>1</b> and <b>2</b> in the neutral ( <b>A<sup>0</sup></b> ), basic ( <b>B<sup>-</sup></b> ), and acid ( <b>C<sup>+</sup></b> and <b>D<sup>+</sup></b> ) media considering the solvent effect (Aqueous Solutions, $\epsilon=58.5$ , and refraction=1.33). <span style="float: right;"><b>44</b></span>                           |
| <b>Table S8</b> | Morokuma-Ziegler EDA for all systems in the neutral ( <b>A<sup>0</sup></b> ), basic ( <b>B<sup>-</sup></b> ), and acid ( <b>C<sup>+</sup></b> and <b>D<sup>+</sup></b> ) media. All values are in kcal mol <sup>-1</sup> <span style="float: right;"><b>44</b></span>                                                                                                        |
| <b>Table S9</b> | Contours of the NOCV deformation density ( $\rho$ ) and the contribution of the interaction to the total orbital interaction ( $k$ ) are presented in kcal mol <sup>-1</sup> for all systems in the neutral ( <b>A<sup>0</sup></b> ), basic ( <b>B<sup>-</sup></b> ) and acid ( <b>C<sup>+</sup></b> and <b>D<sup>+</sup></b> ) <span style="float: right;"><b>46</b></span> |

media.

|                   |                                                                                                                           |           |
|-------------------|---------------------------------------------------------------------------------------------------------------------------|-----------|
| <b>Figure S1</b>  | $^{13}\text{C}$ NMR Spectrum of compound <b>7</b> and <b>6</b> with zoom on an aliphatic and aromatic zone, respectively  | <b>6</b>  |
| <b>Figure S2</b>  | Intermolecular interaction of compound <b>1</b>                                                                           | <b>7</b>  |
| <b>Figure S3</b>  | Torsion angle of compound <b>1</b> .                                                                                      | <b>7</b>  |
| <b>Figure S4</b>  | Mass spectrum of compound <b>1</b>                                                                                        | <b>8</b>  |
| <b>Figure S5</b>  | $^1\text{H}$ NMR ( $\text{DMSO}-d_6$ ) spectrum of compound <b>1</b> .                                                    | <b>8</b>  |
| <b>Figure S6</b>  | $^{13}\text{C}$ NMR ( $\text{DMSO}-d_6$ ) spectrum of compound <b>1</b> .                                                 | <b>9</b>  |
| <b>Figure S7</b>  | $^{13}\text{C}$ NMR extension spectrum corresponding aliphatic region of compound <b>1</b> .                              | <b>9</b>  |
| <b>Figure S8</b>  | $^{119}\text{Sn}$ NMR ( $\text{DMSO}-d_6$ ) spectrum of compound <b>1</b> .                                               | <b>10</b> |
| <b>Figure S9</b>  | COSY correlation ( $\delta_{\text{H}}/\delta_{\text{H}}$ ) spectrum corresponding aromatic region of compound <b>1</b> .  | <b>10</b> |
| <b>Figure S10</b> | COSY correlation ( $\delta_{\text{H}}/\delta_{\text{H}}$ ) spectrum corresponding aliphatic region of compound <b>1</b> . | <b>11</b> |
| <b>Figure S11</b> | HSQC correlation ( $\delta_{\text{H}}/\delta_{\text{C}}$ ) spectrum corresponding aromatic region of compound <b>1</b> .  | <b>11</b> |
| <b>Figure S12</b> | HSQC correlation ( $\delta_{\text{H}}/\delta_{\text{C}}$ ) spectrum corresponding aliphatic region of compound <b>1</b> . | <b>12</b> |
| <b>Figure S13</b> | Mass spectrum of compound <b>2</b> .                                                                                      | <b>12</b> |
| <b>Figure S14</b> | $^1\text{H}$ NMR ( $\text{CDCl}_3$ ) spectrum of compound <b>2</b> .                                                      | <b>13</b> |
| <b>Figure S15</b> | $^1\text{H}$ NMR for H- <i>o</i> spectrum of compound <b>2</b> .                                                          | <b>13</b> |
| <b>Figure S16</b> | $^{13}\text{C}$ NMR ( $\text{CDCl}_3$ ) spectrum of compound <b>2</b> .                                                   | <b>14</b> |
| <b>Figure S17</b> | $^{119}\text{Sn}$ NMR ( $\text{CDCl}_3$ ) spectrum of compound <b>2</b> .                                                 | <b>14</b> |
| <b>Figure S18</b> | COSY correlation ( $\delta_{\text{H}}/\delta_{\text{H}}$ ) spectrum corresponding of compound <b>2</b> .                  | <b>15</b> |
| <b>Figure S19</b> | HSQC correlation ( $\delta_{\text{H}}/\delta_{\text{C}}$ ) spectrum corresponding of compound <b>2</b> .                  | <b>15</b> |
| <b>Figure S20</b> | Mass spectrum of compound <b>3</b> .                                                                                      | <b>16</b> |

|                   |                                                                                                                           |           |
|-------------------|---------------------------------------------------------------------------------------------------------------------------|-----------|
| <b>Figure S21</b> | $^1\text{H}$ NMR ( $\text{CDCl}_3$ ) spectrum of compound <b>3</b> .                                                      | <b>16</b> |
| <b>Figure S22</b> | $^{13}\text{C}$ NMR ( $\text{CDCl}_3$ ) spectrum of compound <b>3</b> .                                                   | <b>17</b> |
| <b>Figure S23</b> | $^{13}\text{C}$ NMR ( $\text{CDCl}_3$ ) expansion spectrum of compound <b>3</b> .                                         | <b>17</b> |
| <b>Figure S24</b> | Coupling constant $J(^{13}\text{C}, ^{119/117}\text{Sn})$ of compound <b>3</b> .                                          | <b>18</b> |
| <b>Figure S25</b> | $^{119}\text{Sn}$ NMR ( $\text{CDCl}_3$ ) spectrum of compound <b>3</b> .                                                 | <b>18</b> |
| <b>Figure S26</b> | COSY correlation ( $\delta_{\text{H}}/\delta_{\text{H}}$ ) spectrum corresponding aromatic region of compound <b>3</b> .  | <b>19</b> |
| <b>Figure S27</b> | COSY correlation ( $\delta_{\text{H}}/\delta_{\text{H}}$ ) spectrum aliphatic region of compound <b>3</b> .               | <b>19</b> |
| <b>Figure S28</b> | HSQC correlation ( $\delta_{\text{H}}/\delta_{\text{C}}$ ) spectrum corresponding aromatic region of compound <b>3</b> .  | <b>20</b> |
| <b>Figure S29</b> | HSQC correlation ( $\delta_{\text{H}}/\delta_{\text{C}}$ ) spectrum corresponding aliphatic region of compound <b>3</b> . | <b>20</b> |
| <b>Figure S30</b> | Mass spectrum of compound <b>4</b> .                                                                                      | <b>21</b> |
| <b>Figure S31</b> | $^1\text{H}$ NMR ( $\text{DMSO}-d_6$ ) spectrum of compound <b>4</b> .                                                    | <b>21</b> |
| <b>Figure S32</b> | $^{13}\text{C}$ NMR ( $\text{DMSO}-d_6$ ) spectrum of compound <b>4</b> .                                                 | <b>22</b> |
| <b>Figure S33</b> | $^{13}\text{C}$ NMR expansion spectrum of compound <b>4</b> .                                                             | <b>22</b> |
| <b>Figure S34</b> | $^{119}\text{Sn}$ NMR ( $\text{DMSO}-d_6$ ) spectrum of compound <b>4</b> .                                               | <b>23</b> |
| <b>Figure S35</b> | COSY correlation ( $\delta_{\text{H}}/\delta_{\text{H}}$ ) spectrum corresponding of compound <b>4</b> .                  | <b>23</b> |
| <b>Figure S36</b> | HSQC correlation ( $\delta_{\text{H}}/\delta_{\text{C}}$ ) spectrum corresponding of compound <b>4</b> .                  | <b>24</b> |
| <b>Figure S37</b> | $^1\text{H}$ NMR ( $(\text{CD}_3)_2\text{CO}$ ) spectrum of compound <b>5</b> .                                           | <b>24</b> |
| <b>Figure S38</b> | $^{13}\text{C}$ NMR ( $(\text{CD}_3)_2\text{CO}$ ) spectrum of compound <b>5</b> .                                        | <b>25</b> |
| <b>Figure S39</b> | $^{13}\text{C}$ NMR expansion spectrum of compound <b>5</b> .                                                             | <b>25</b> |
| <b>Figure S40</b> | Coupling constant $J(^{13}\text{C}, ^{119/117}\text{Sn})$ of compound <b>5</b> .                                          | <b>26</b> |
| <b>Figure S41</b> | $^{119}\text{Sn}$ NMR ( $(\text{CD}_3)_2\text{CO}$ ) spectrum of compound <b>5</b> .                                      | <b>26</b> |
| <b>Figure S42</b> | COSY correlation ( $\delta_{\text{H}}/\delta_{\text{H}}$ ) spectrum corresponding aromatic region of compound <b>5</b> .  | <b>27</b> |

|                   |                                                                                                                           |           |
|-------------------|---------------------------------------------------------------------------------------------------------------------------|-----------|
| <b>Figure S43</b> | COSY correlation ( $\delta_{\text{H}}/\delta_{\text{H}}$ ) spectrum corresponding aliphatic region of <b>5</b> .          | <b>27</b> |
| <b>Figure S44</b> | HSQC correlation ( $\delta\text{H}/\delta\text{C}$ ) spectrum corresponding aromatic region of compound <b>5</b> .        | <b>28</b> |
| <b>Figure S45</b> | HSQC correlation ( $\delta\text{H}/\delta\text{C}$ ) spectrum corresponding aliphatic region of compound <b>5</b> .       | <b>28</b> |
| <b>Figure S46</b> | Mass spectrum of compound <b>6</b> .                                                                                      | <b>29</b> |
| <b>Figure S47</b> | $^1\text{H}$ NMR ( $\text{CDCl}_3$ ) spectrum of compound <b>6</b> .                                                      | <b>29</b> |
| <b>Figure S48</b> | $^{13}\text{C}$ NMR ( $\text{CDCl}_3$ ) spectrum of compound <b>6</b> .                                                   | <b>30</b> |
| <b>Figure S49</b> | Coupling constant $J(^{13}\text{C}, ^{119/117}\text{Sn})$ of compound <b>6</b> .                                          | <b>30</b> |
| <b>Figure S50</b> | $^{119}\text{Sn}$ NMR ( $\text{CDCl}_3$ ) spectrum of compound <b>6</b> .                                                 | <b>31</b> |
| <b>Figure S51</b> | COSY correlation ( $\delta_{\text{H}}/\delta_{\text{H}}$ ) spectrum corresponding of compound <b>6</b> .                  | <b>31</b> |
| <b>Figure S52</b> | Mass spectrum of compound <b>7</b> .                                                                                      | <b>32</b> |
| <b>Figure S53</b> | $^1\text{H}$ NMR ( $\text{CDCl}_3$ ) spectrum of compound <b>7</b> .                                                      | <b>32</b> |
| <b>Figure S54</b> | $^{13}\text{C}$ NMR ( $\text{CDCl}_3$ ) spectrum of compound <b>7</b> .                                                   | <b>33</b> |
| <b>Figure S55</b> | $^{13}\text{C}$ NMR expansion spectrum of compound <b>7</b> .                                                             | <b>33</b> |
| <b>Figure S56</b> | Coupling constant $J(^{13}\text{C}, ^{119/117}\text{Sn})$ of compound <b>7</b> .                                          | <b>34</b> |
| <b>Figure S57</b> | $^{119}\text{Sn}$ NMR ( $\text{CDCl}_3$ ) spectrum of compound <b>7</b> .                                                 | <b>34</b> |
| <b>Figure S58</b> | COSY correlation ( $\delta_{\text{H}}/\delta_{\text{H}}$ ) spectrum corresponding aromatic region of compound <b>7</b> .  | <b>35</b> |
| <b>Figure S59</b> | COSY correlation ( $\delta_{\text{H}}/\delta_{\text{H}}$ ) spectrum corresponding aliphatic region of compound <b>7</b> . | <b>35</b> |
| <b>Figure S60</b> | HSQC correlation ( $\delta\text{H}/\delta\text{C}$ ) spectrum corresponding aromatic region of compound <b>7</b> .        | <b>36</b> |
| <b>Figure S61</b> | HSQC correlation ( $\delta\text{H}/\delta\text{C}$ ) spectrum corresponding aliphatic region of compound <b>7</b> .       | <b>36</b> |
| <b>Figure S62</b> | Mass spectrum of compound <b>8</b> .                                                                                      | <b>37</b> |
| <b>Figure S63</b> | $^1\text{H}$ NMR ( $\text{CDCl}_3$ ) spectrum of compound <b>8</b> .                                                      | <b>37</b> |

|                    |                                                                                                                                                                                                                         |           |
|--------------------|-------------------------------------------------------------------------------------------------------------------------------------------------------------------------------------------------------------------------|-----------|
| <b>Figure S64</b>  | $^1\text{H}$ NMR H- <i>o</i> spectrum of compound <b>8</b> .                                                                                                                                                            | <b>38</b> |
| <b>Figure S65</b>  | $^{13}\text{C}$ NMR ( $\text{CDCl}_3$ ) spectrum of compound <b>8</b> .                                                                                                                                                 | <b>38</b> |
| <b>Figure S66</b>  | Coupling constant $J(^{13}\text{C}, ^{119/117}\text{Sn})$ of compound <b>8</b>                                                                                                                                          | <b>39</b> |
| <b>Figure S67</b>  | $^{119}\text{Sn}$ NMR ( $\text{CDCl}_3$ ) spectrum of compound <b>8</b> .                                                                                                                                               | <b>39</b> |
| <b>Figure S68</b>  | Emission spectra of halochromism for compound <b>1, 2, 3</b> , and <b>4</b> .                                                                                                                                           | <b>40</b> |
| <b>Figure S69</b>  | Emission spectra of halochromism for compounds <b>6, 7</b> and <b>8</b> .                                                                                                                                               | <b>40</b> |
| <b>Figure. S70</b> | Optimized structures of <b>1</b> and <b>2</b> in the ground ( $S_0$ ) and the first-singlet excited ( $S_1$ ) state: neutral ( $\text{A}^0$ ), basic ( $\text{B}^-$ ) and acid ( $\text{C}^+$ and $\text{D}^+$ ) media. | <b>42</b> |

**Table S1.** Reaction time and yields by two synthetic routes of **1-8**.

| Comp.    | Conventional heating |           | Microwave irradiation |           | Reaction time improve |
|----------|----------------------|-----------|-----------------------|-----------|-----------------------|
|          | Time (h)             | Yield (%) | Time (min)            | Yield (%) |                       |
| <b>1</b> | 24                   | 78        | 3                     | 83        | 480                   |
| <b>2</b> | 24                   | 63        | 6                     | 86        | 240                   |
| <b>3</b> | 24                   | 60        | 3                     | 97        | 480                   |
| <b>4</b> | 24                   | 59        | 6                     | 89        | 240                   |
| <b>5</b> | 24                   | 72        | 3                     | 91        | 480                   |
| <b>6</b> | 24                   | 63        | 6                     | 88        | 240                   |
| <b>7</b> | 24                   | 57        | 3                     | 90        | 480                   |
| <b>8</b> | 24                   | 62        | 6                     | 87        | 240                   |

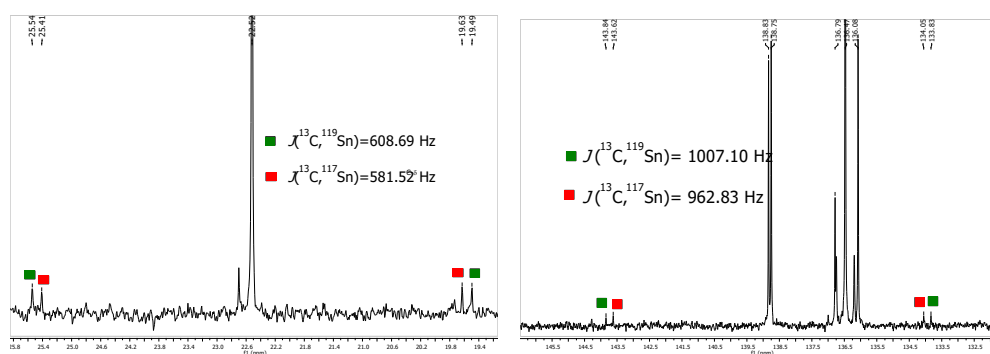

**Figure S1.**  $^{13}\text{C}$  NMR Spectrum of compound **7** (left) and **6** (right) with zoom on an aliphatic and aromatic zone, respectively.

**Table S2.** Crystal data for compound **1**

|                                                              |                                                                  |
|--------------------------------------------------------------|------------------------------------------------------------------|
| Empirical formula                                            | C <sub>21</sub> H <sub>26</sub> N <sub>2</sub> O <sub>5</sub> Sn |
| Formula weight                                               | 505.13                                                           |
| Temperature, K                                               | 293(2)                                                           |
| Wavelength                                                   | 0.71073                                                          |
| Crystal system                                               | Monoclinic                                                       |
| Space group                                                  | <i>P</i> 2(1)/ <i>c</i>                                          |
| <i>a</i> , Å                                                 | 9.67160 (10)                                                     |
| <i>b</i> , Å                                                 | 16.2257 (3)                                                      |
| <i>c</i> , Å                                                 | 14.4268 (15)                                                     |
| $\alpha$                                                     | 90.00 °                                                          |
| $\beta$                                                      | 100.982(2)°                                                      |
| $\gamma$                                                     | 90.00°                                                           |
| <i>V</i> , Å <sup>3</sup>                                    | 2132.42 (5)                                                      |
| <i>Z</i>                                                     | 4                                                                |
| $\rho_{\text{calc}}$ , mg.cm <sup>-3</sup>                   | 1.573                                                            |
| $\mu$ , mm <sup>-1</sup>                                     | 1.232                                                            |
| 2 $\theta$ range for data collection                         | 2.924 – 27.466°                                                  |
| Index ranges                                                 | -18 ≤ <i>h</i> ≤ 18,                                             |
| No. of reflns collected                                      | 43394                                                            |
| No. of indep reflns                                          | 3977                                                             |
| [ <i>R</i> <sub>int</sub> ]                                  | 0.0311                                                           |
| Goodness of fit                                              | 1.054                                                            |
| <i>R</i> 1, <i>wR</i> 2 ( <i>I</i> >2 $\sigma$ ( <i>I</i> )) | 0.0317/0.0765                                                    |
| <i>R</i> 1, <i>wR</i> 2 (all data)                           | 0.0429/0.0843                                                    |

**Table S3.** Emission data of compounds **1-8** at different pH values.

| Comp.    | pH 5 | pH 6 | pH 7 | pH 8 | Effect below<br>pH 7 |
|----------|------|------|------|------|----------------------|
| <b>1</b> | 519  | 517  | 538  | 524  | Hypochromic          |
| <b>2</b> | 525  | 541  | 517  | 542  | Hypochromic          |
| <b>3</b> | 513  | 515  | 530  | 529  | Hypochromic          |
| <b>4</b> | 491  | 490  | 492  | 492  | Hyperchromic         |
| <b>6</b> | 550  | 554  | 560  | 571  | Hyperchromic         |
| <b>7</b> | 519  | 517  | 538  | 528  | Hypochromic          |
| <b>8</b> | 524  | 553  | 525  | 541  | Hypochromic          |

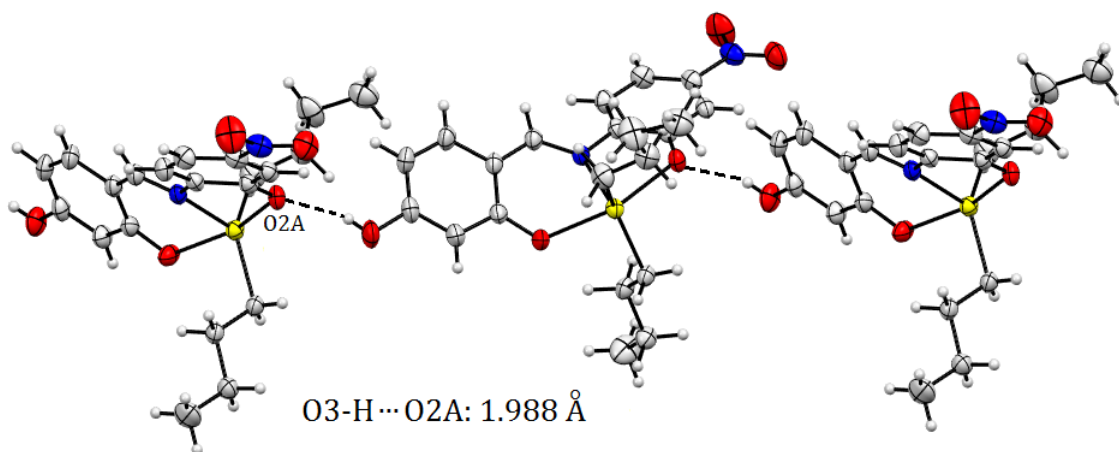

**Figure S2.** Intermolecular interaction of compound **1**

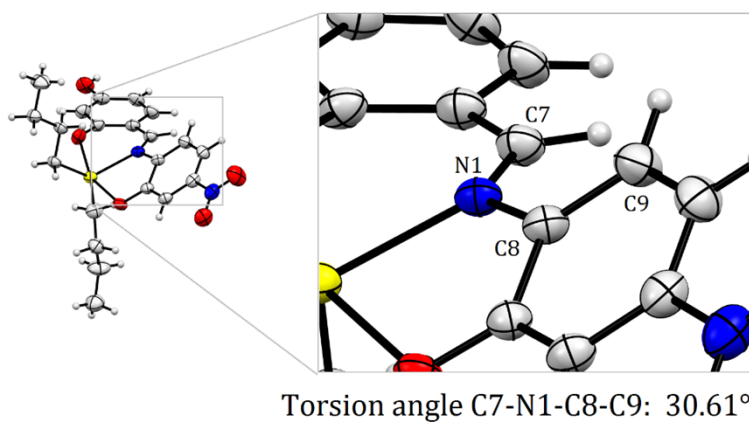

**Figure S3.** Torsion angle of compound **1**.

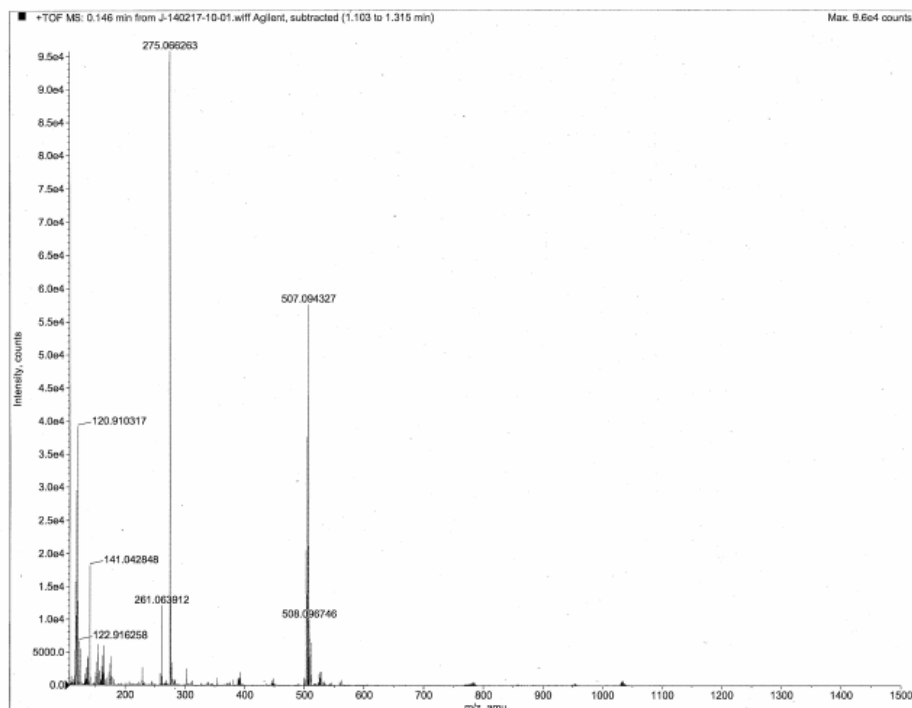

Figure S4. Mass spectrum of compound 1

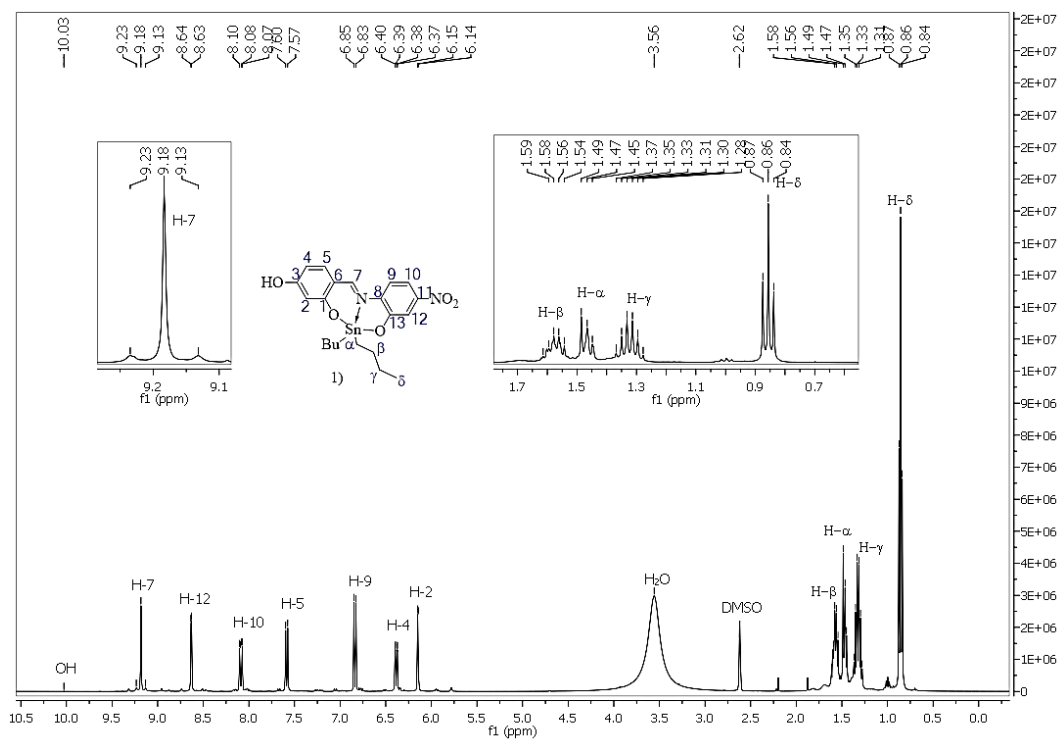

Figure S5. <sup>1</sup>H NMR (DMSO-*d*<sub>6</sub>) spectrum of compound 1.



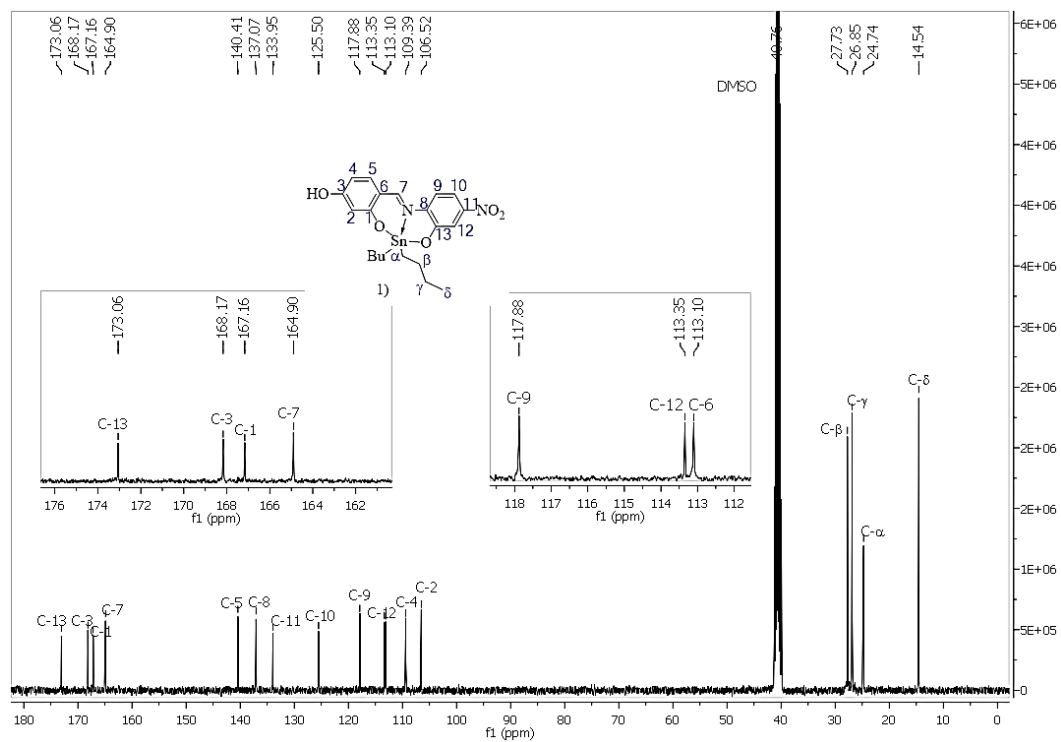

**Figure S6.**  $^{13}\text{C}$  NMR (DMSO- $d_6$ ) spectrum of compound 1.

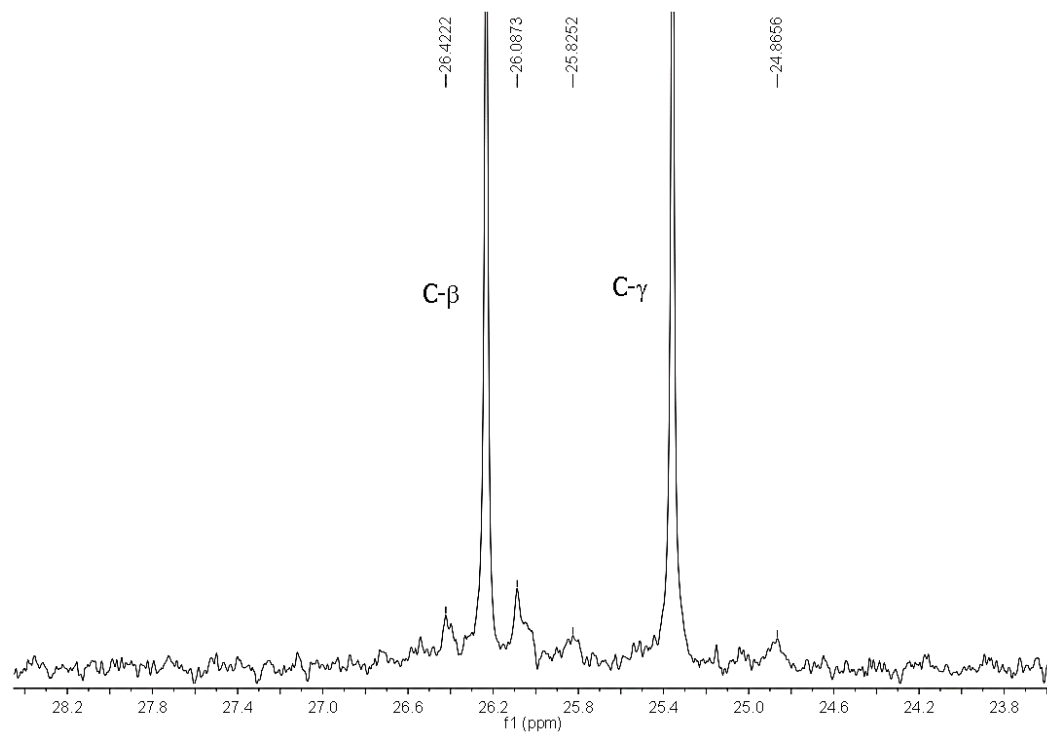

**Figure S7.**  $^{13}\text{C}$  NMR extension spectrum corresponding aliphatic region of compound 1.

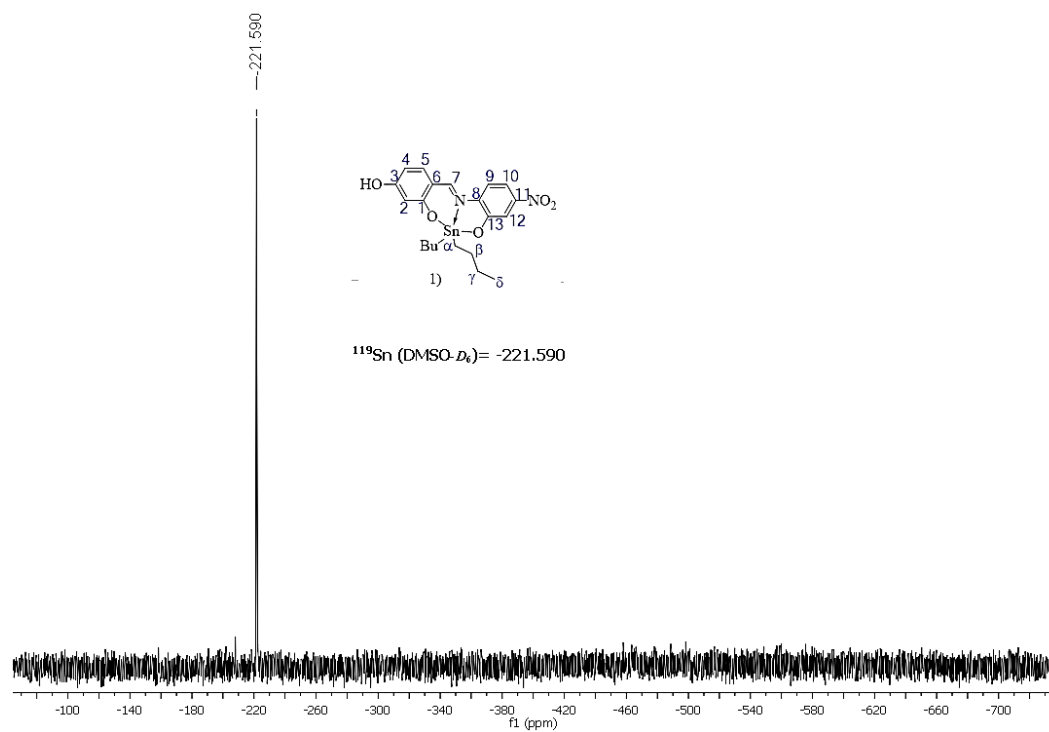

**Figure S8.**  $^{119}\text{Sn}$  NMR (DMSO- $d_6$ ) spectrum of compound **1**.

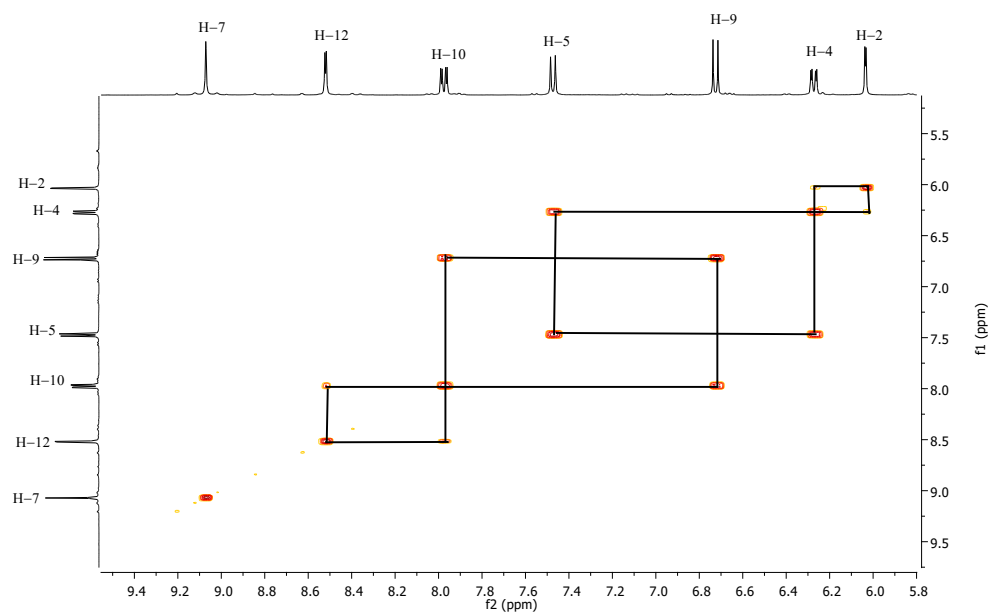

**Figure S9.** COSY correlation ( $\delta_{\text{H}}/\delta_{\text{H}}$ ) spectrum corresponding aromatic region of compound **1**.

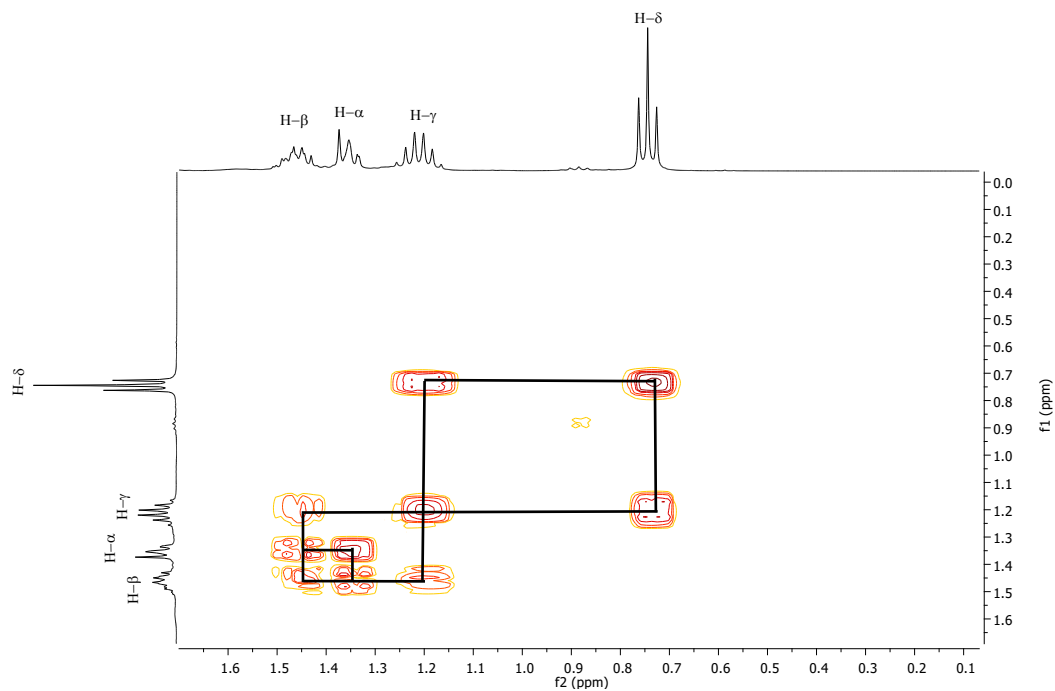

**Figure S10.** COSY correlation ( $\delta_H/\delta_H$ ) spectrum corresponding aliphatic region of compound **1**.

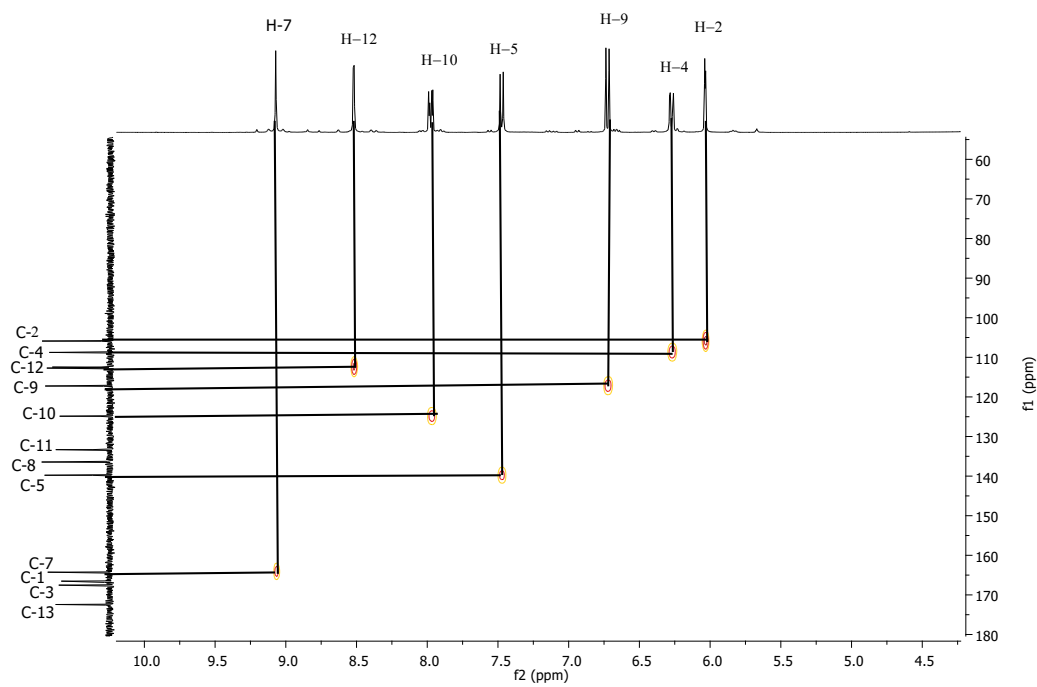

**Figure S11.** HSQC correlation ( $\delta_H/\delta_C$ ) spectrum corresponding aromatic region of compound **1**.

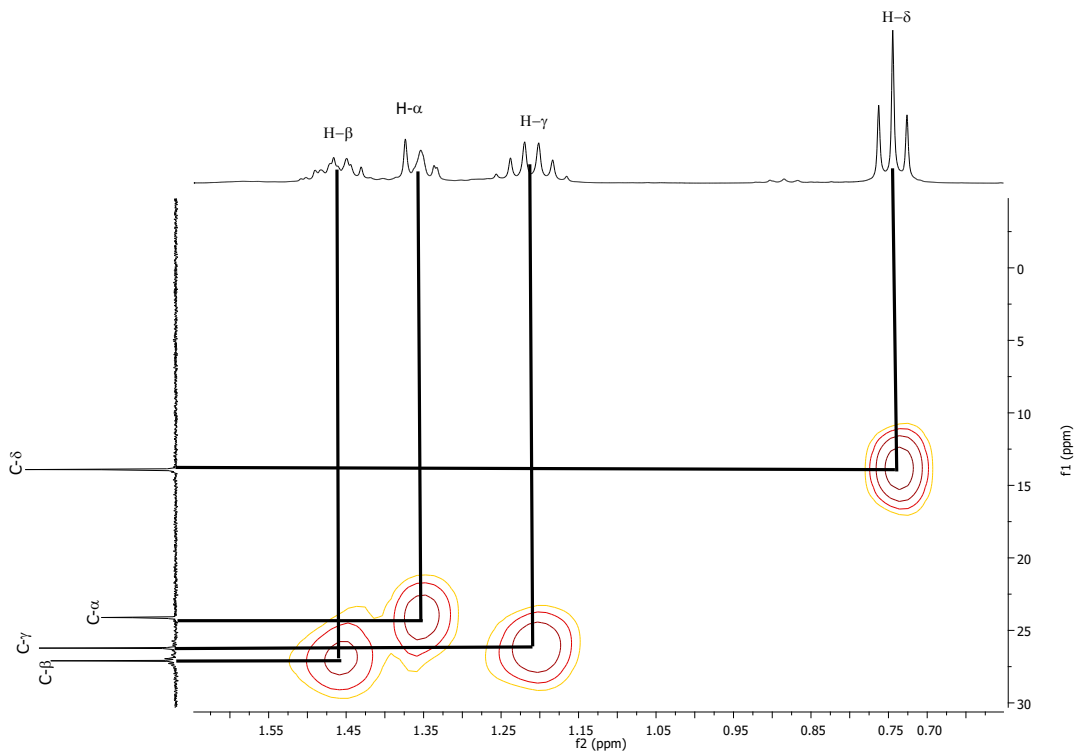

**Figure S12.** HSQC correlation ( $\delta\text{H}/\delta\text{C}$ ) spectrum corresponding aliphatic region of compound 1.

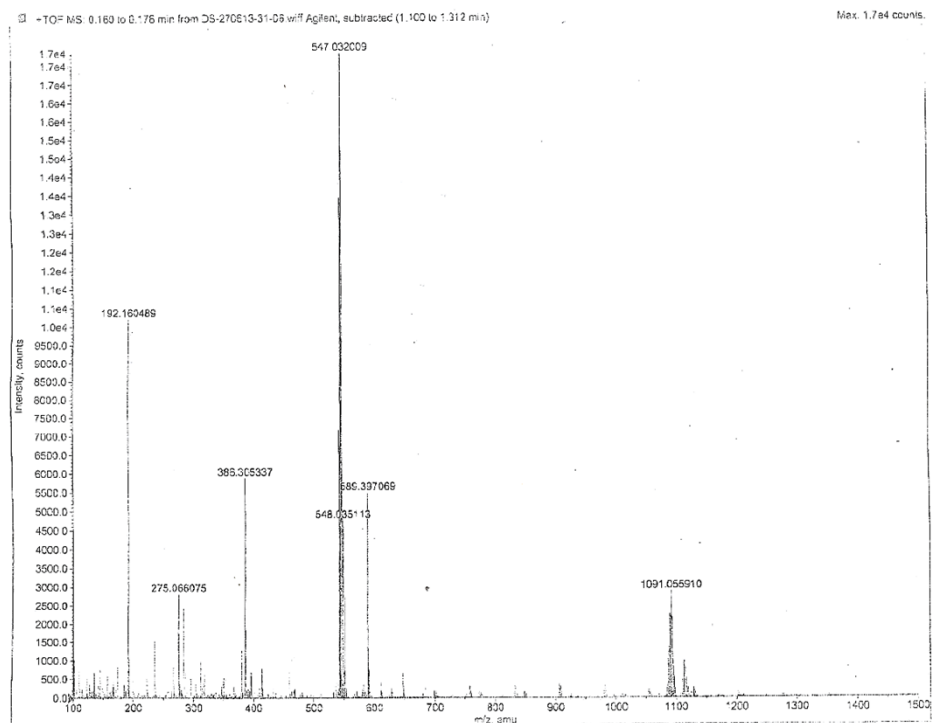

**Figure S13.** Mass spectrum of compound 2.

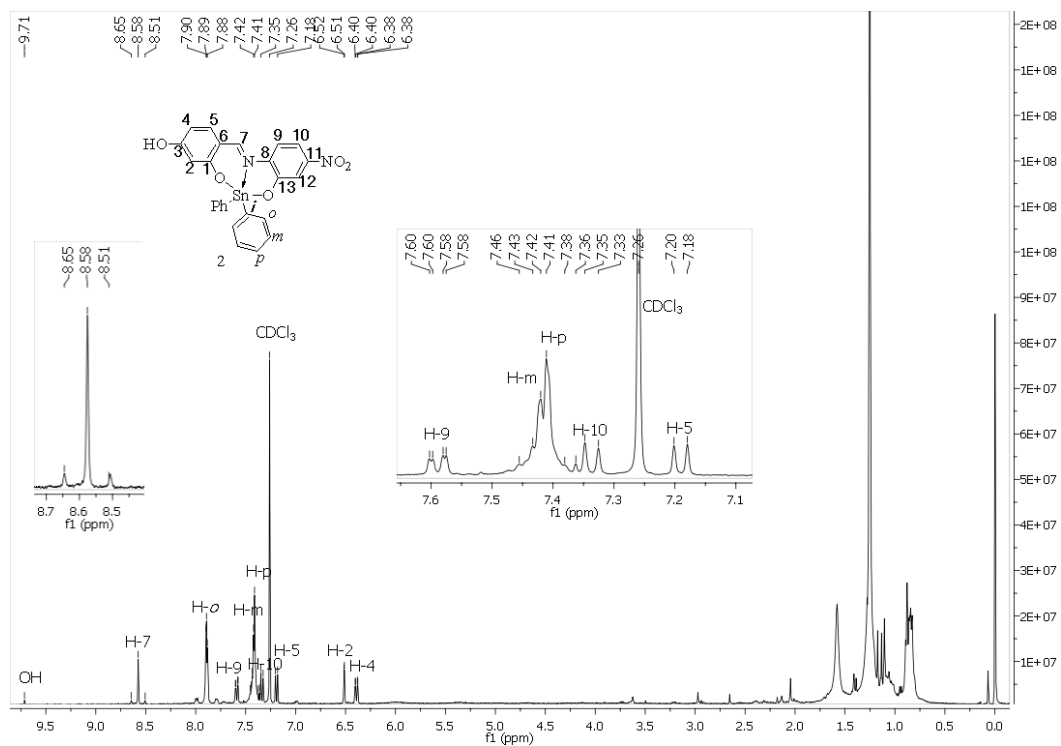

Figure S14.  $^1\text{H}$  NMR ( $\text{CDCl}_3$ ) spectrum of compound **2**.

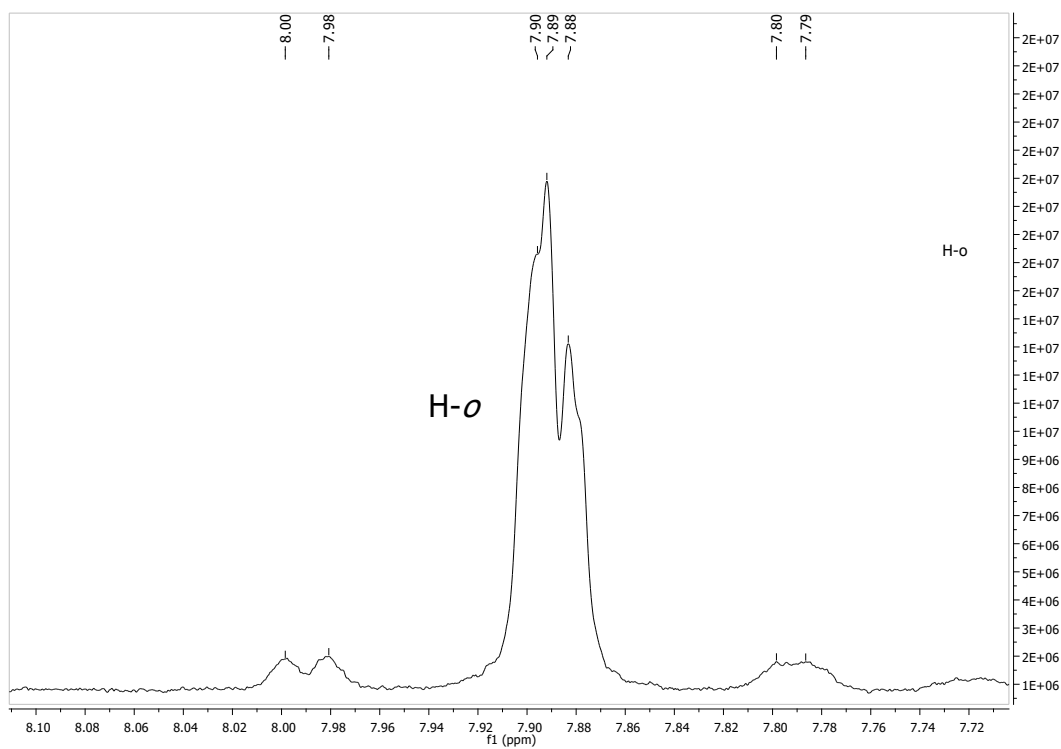

Figure S15.  $^1\text{H}$  NMR for H-o spectrum of compound **2**.

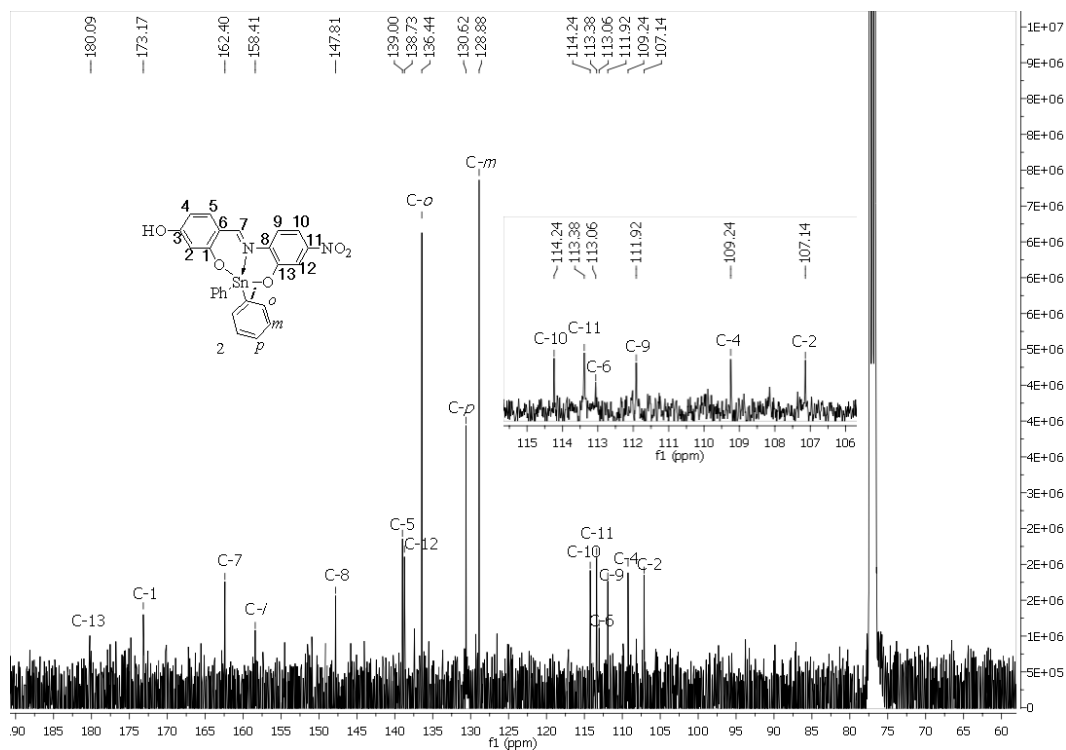

Figure S16  $^{13}\text{C}$  NMR ( $\text{CDCl}_3$ ) spectrum of compound 2.

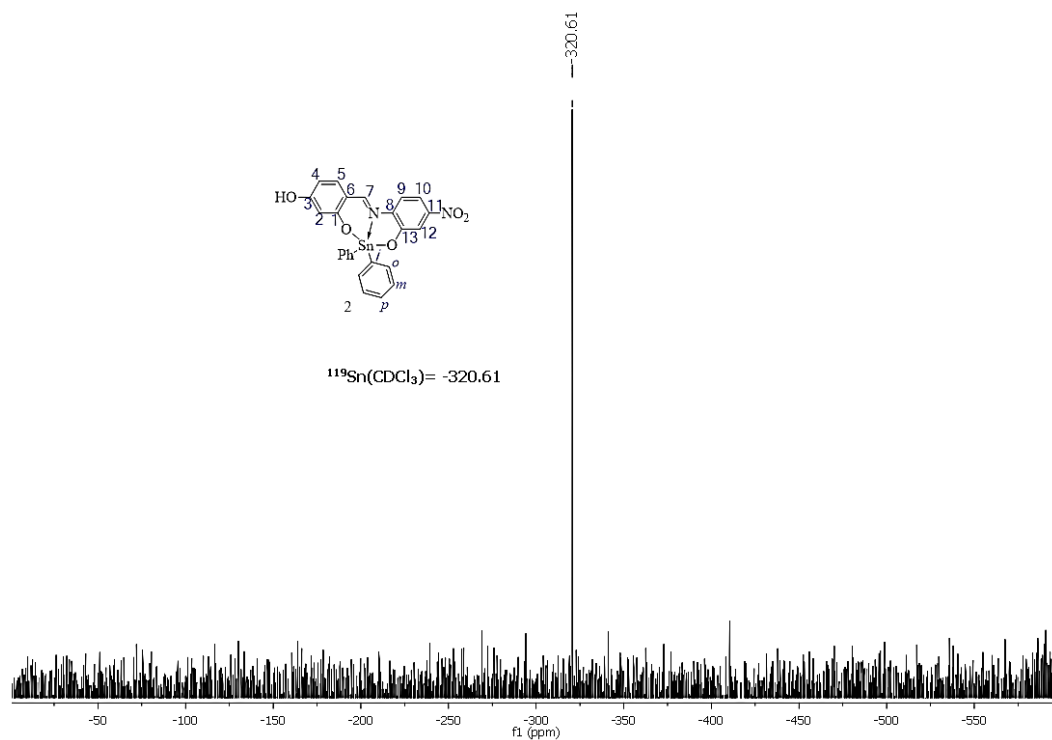

Figure S17.  $^{119}\text{Sn}$  NMR ( $\text{CDCl}_3$ ) spectrum of compound 2.

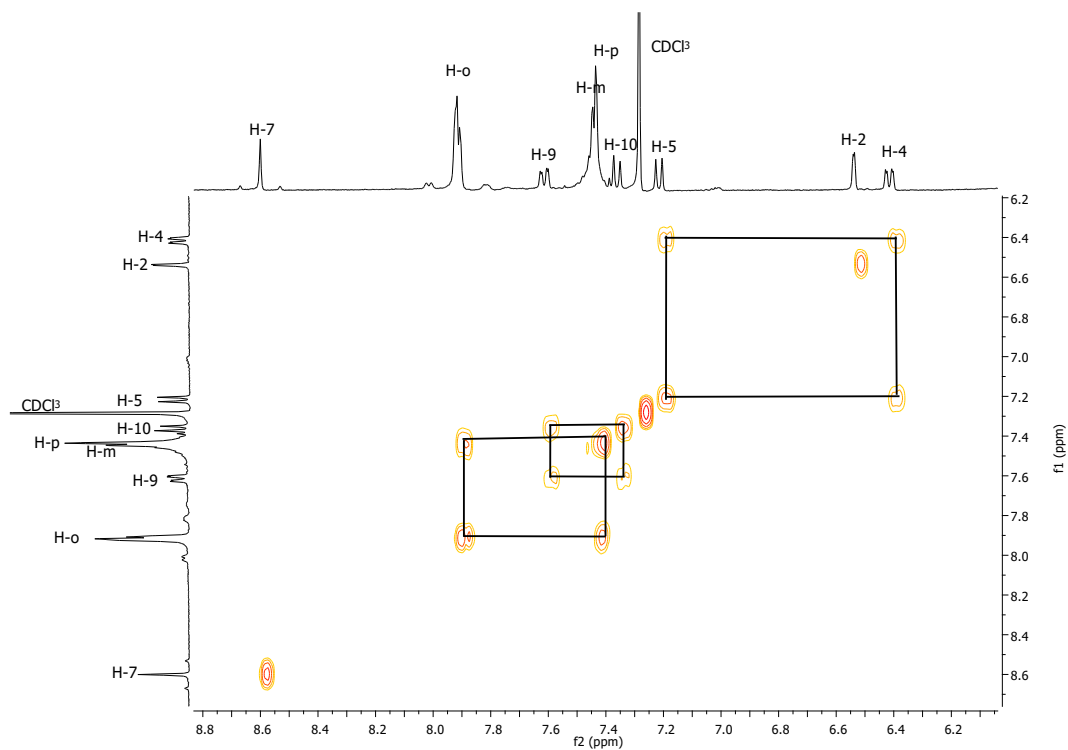

**Figure S18.** COSY correlation ( $\delta_H/\delta_H$ ) spectrum corresponding of compound **2**.

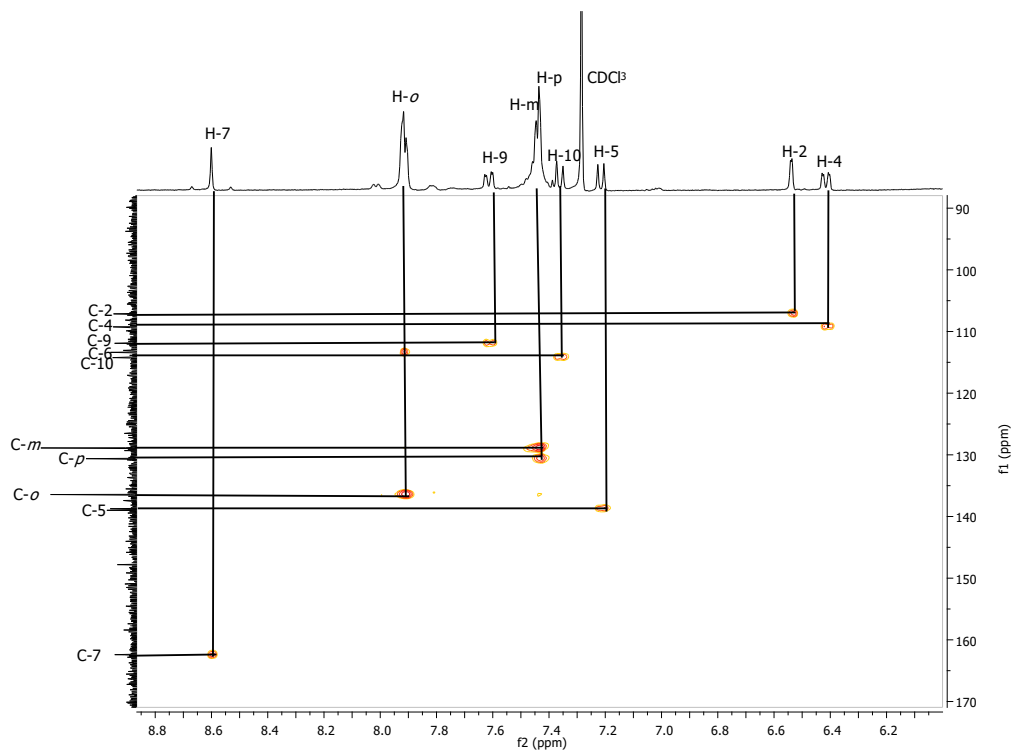

**Figure S19.** HSQC correlation ( $\delta_H/\delta_C$ ) spectrum corresponding of compound **2**.

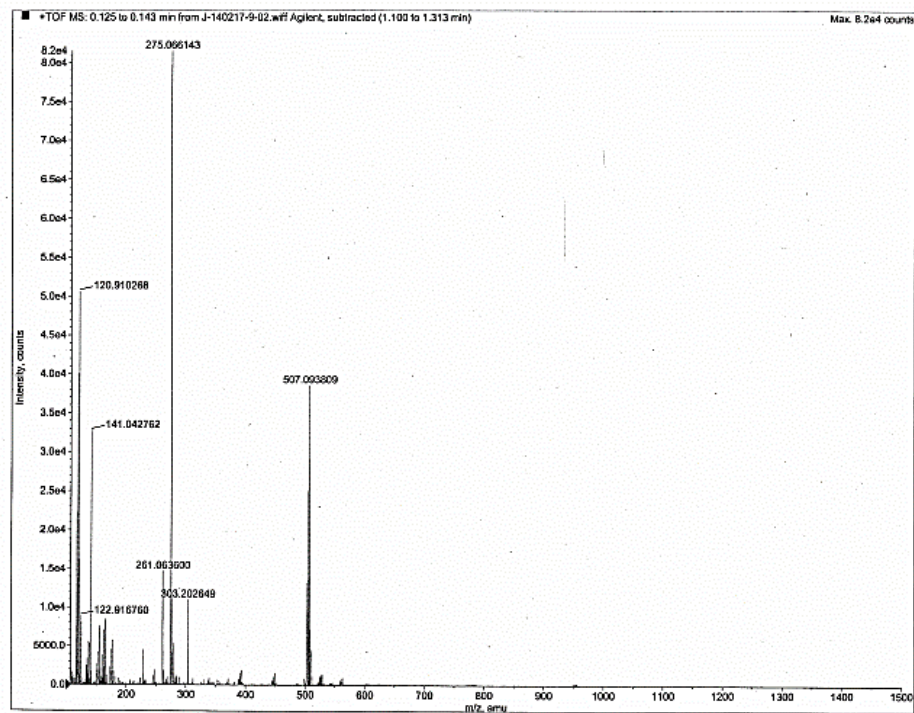

Figure S20. Mass spectrum of compound 3.

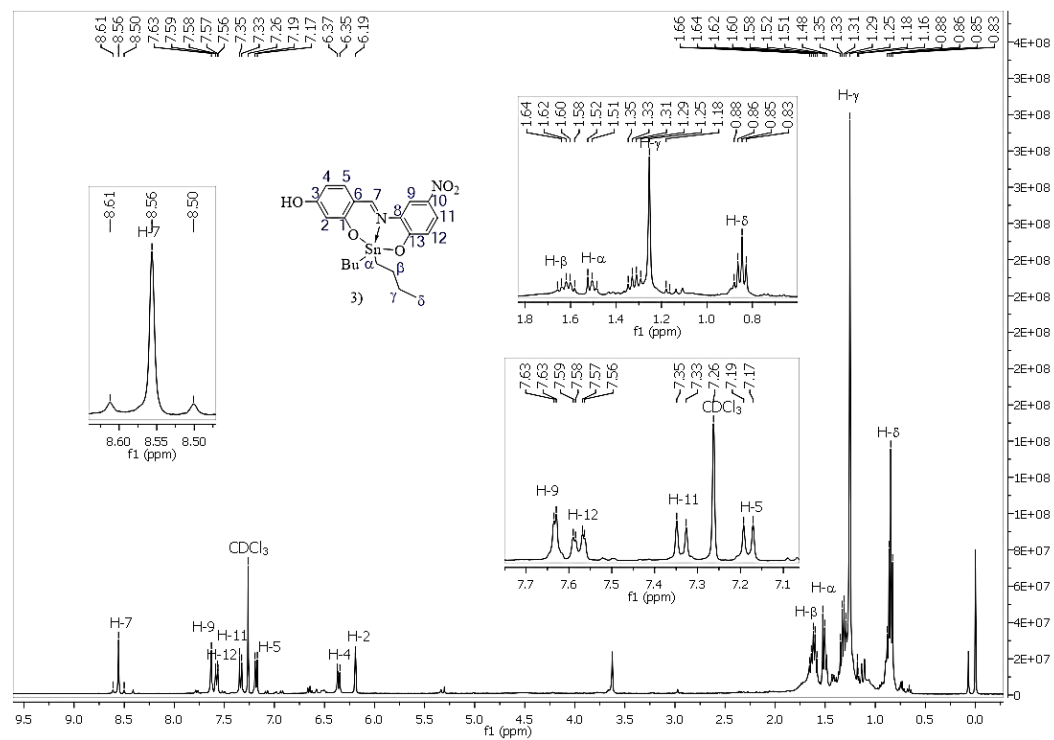

Figure S21. <sup>1</sup>H NMR (CDCl<sub>3</sub>) spectrum of compound 3.



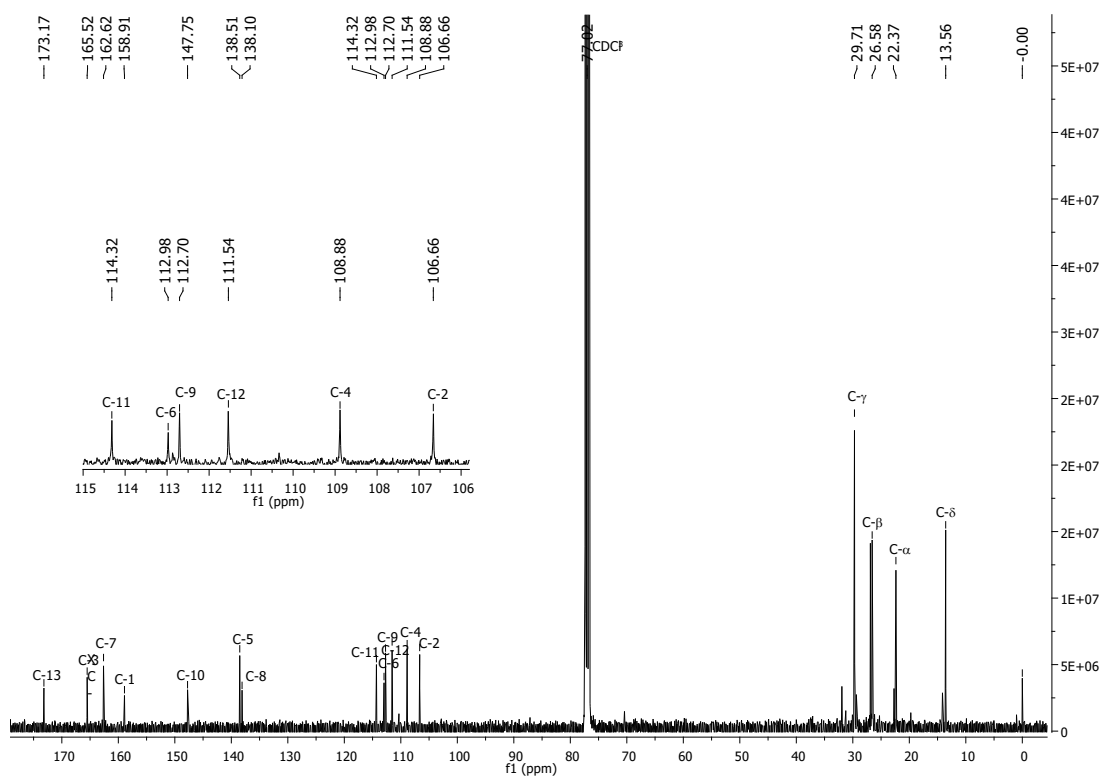

**Figure S22.**  $^{13}\text{C}$  NMR ( $\text{CDCl}_3$ ) spectrum of compound **3**.

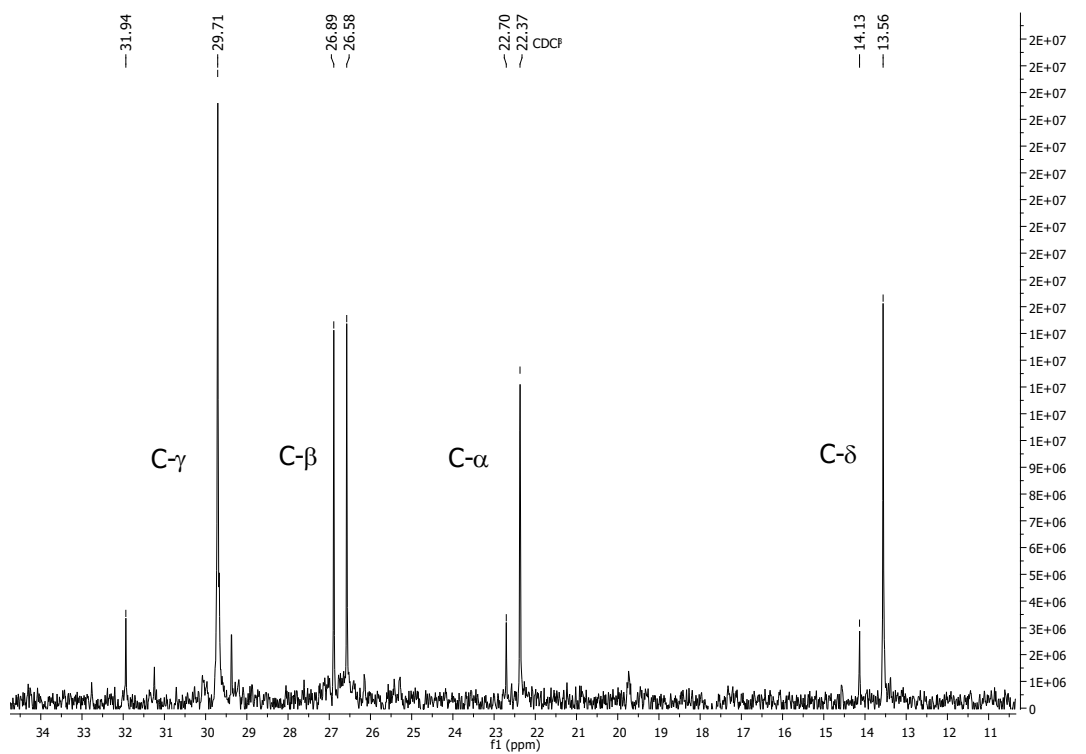

**Figure S23.**  $^{13}\text{C}$  NMR ( $\text{CDCl}_3$ ) expansion spectrum of compound **3**.

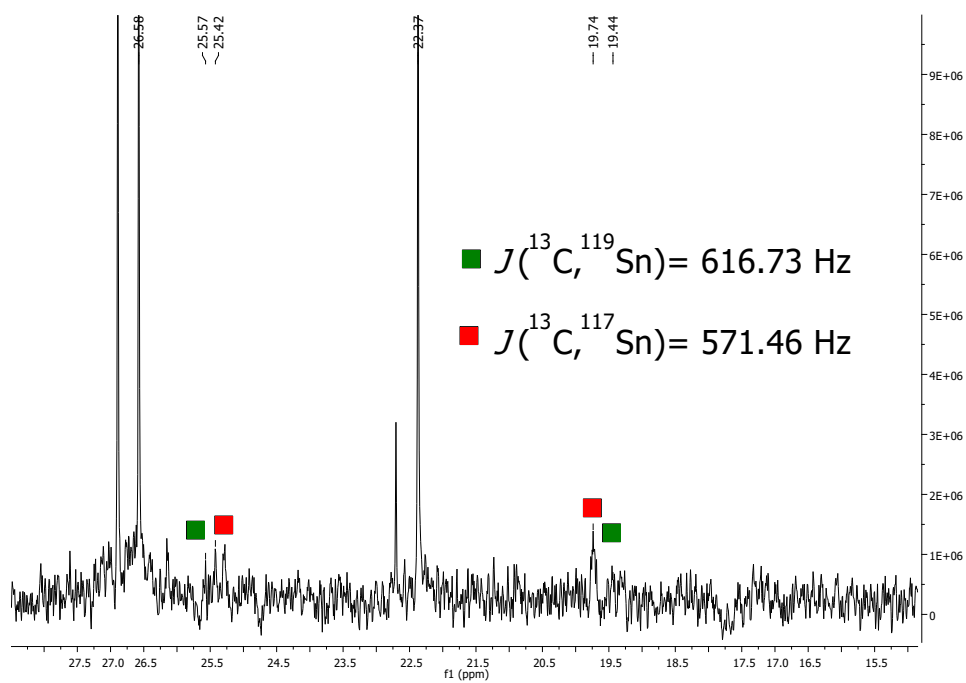

Figure S24. Coupling constant  $J(^{13}\text{C}, ^{119/117}\text{Sn})$  of compound 3.

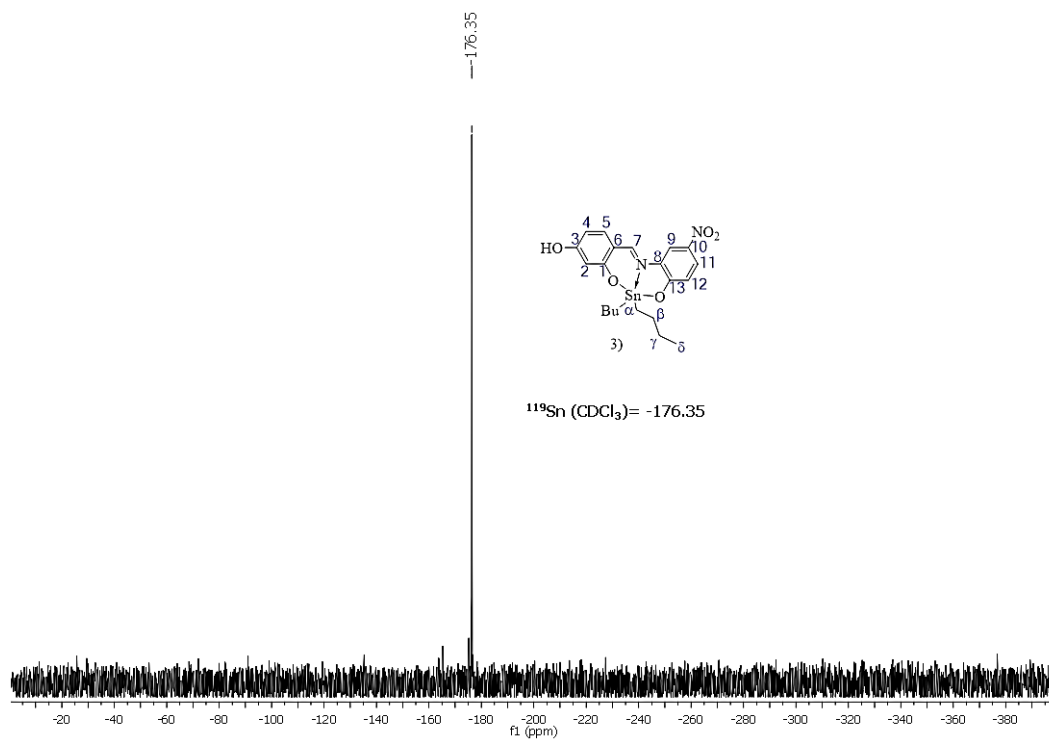

Figure S25.  $^{119}\text{Sn}$  NMR ( $\text{CDCl}_3$ ) spectrum of compound 3.

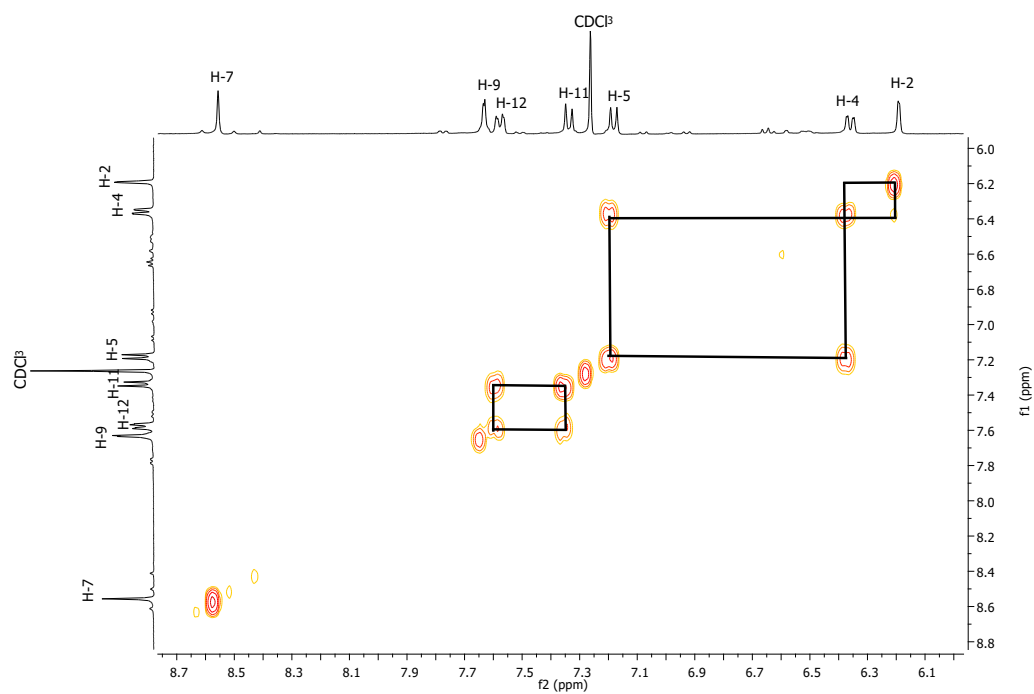

**Figure S26.** COSY correlation ( $\delta_{\text{H}}/\delta_{\text{H}}$ ) spectrum corresponding aromatic region of compound 3.

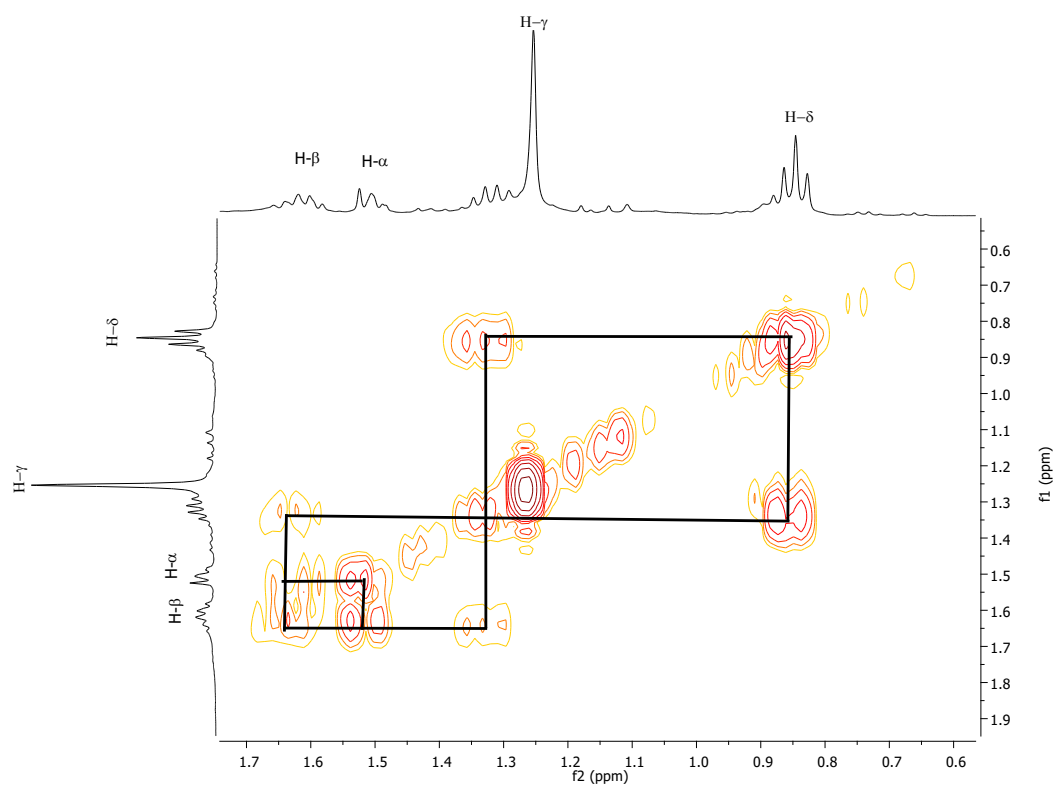

**Figure S27.** COSY correlation ( $\delta_{\text{H}}/\delta_{\text{H}}$ ) spectrum aliphatic region of compound 3.

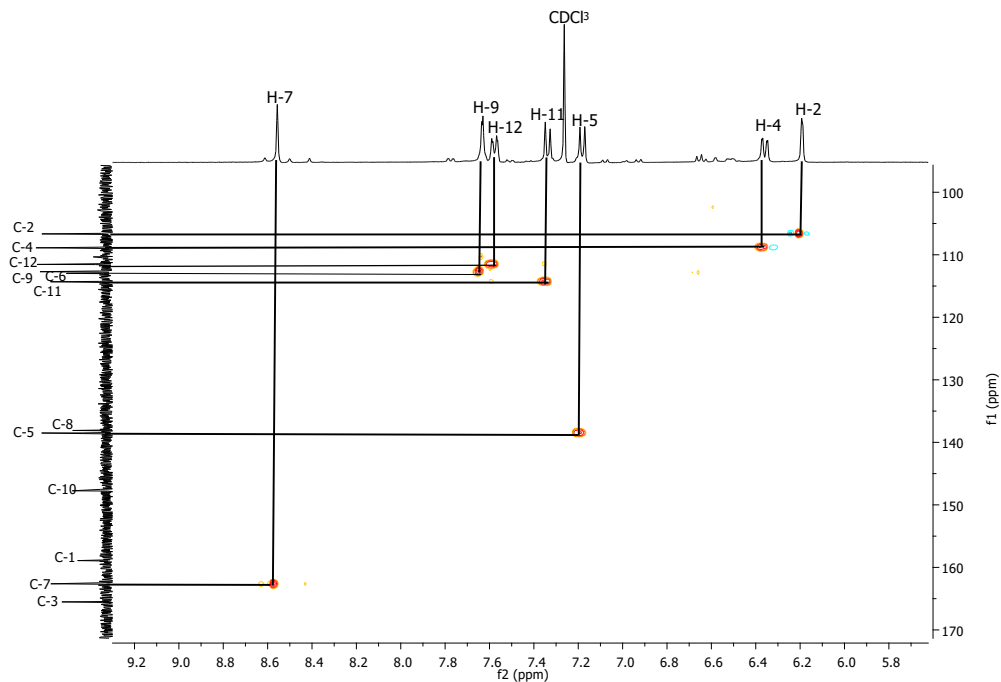

**Figure S28.** HSQC correlation ( $\delta\text{H}/\delta\text{C}$ ) spectrum corresponding aromatic region of compound **3**.

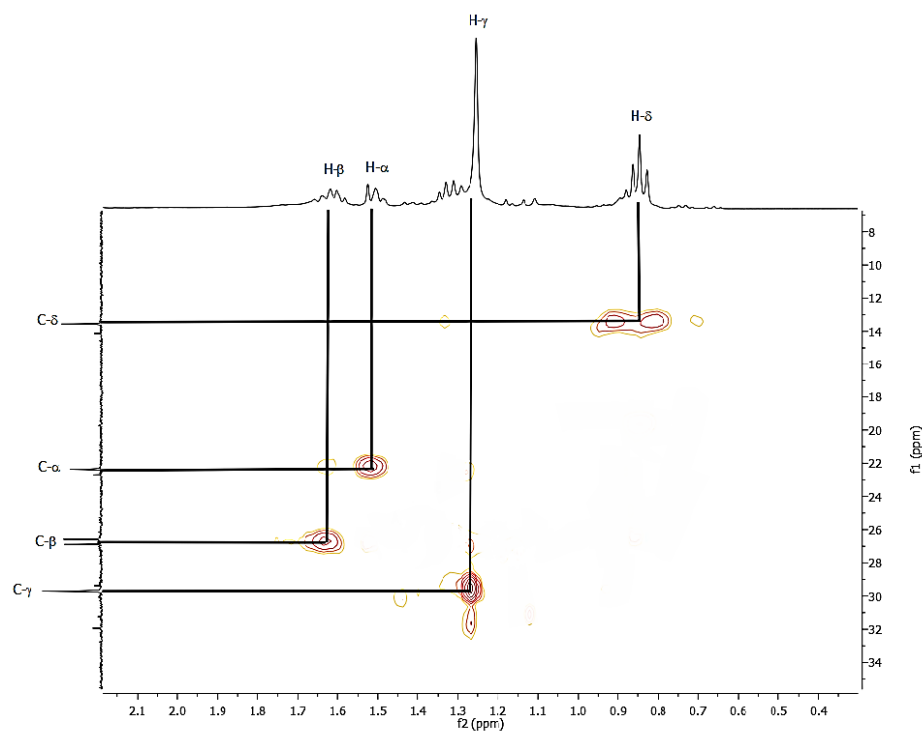

**Figure S29.** HSQC correlation ( $\delta\text{H}/\delta\text{C}$ ) spectrum corresponding aliphatic region of compound **3**.

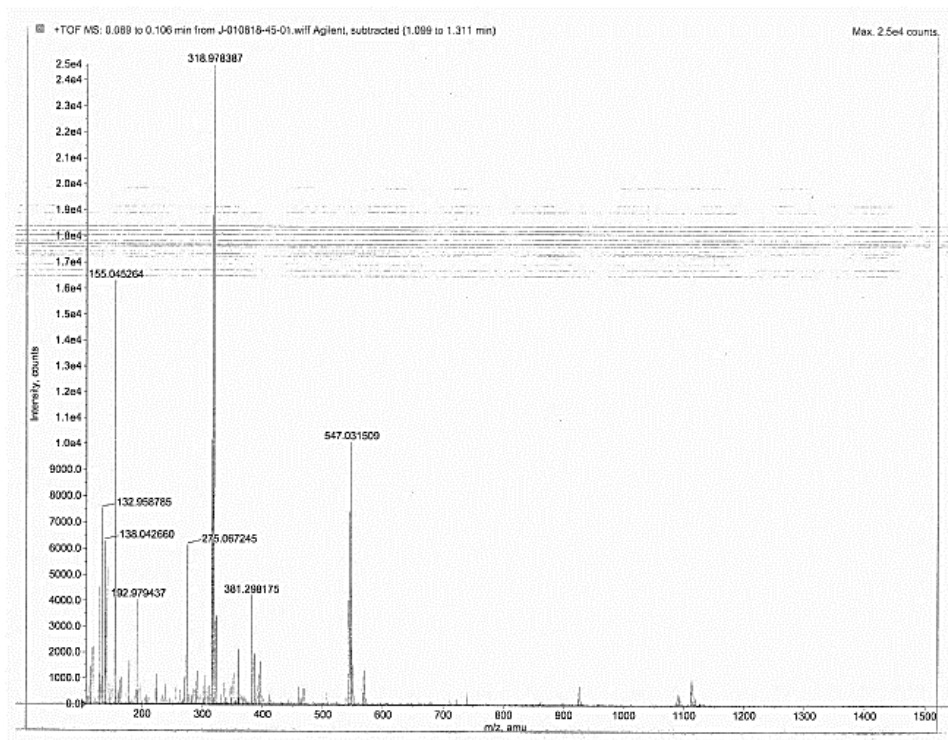

Figure S30. Mass spectrum of compound 4.

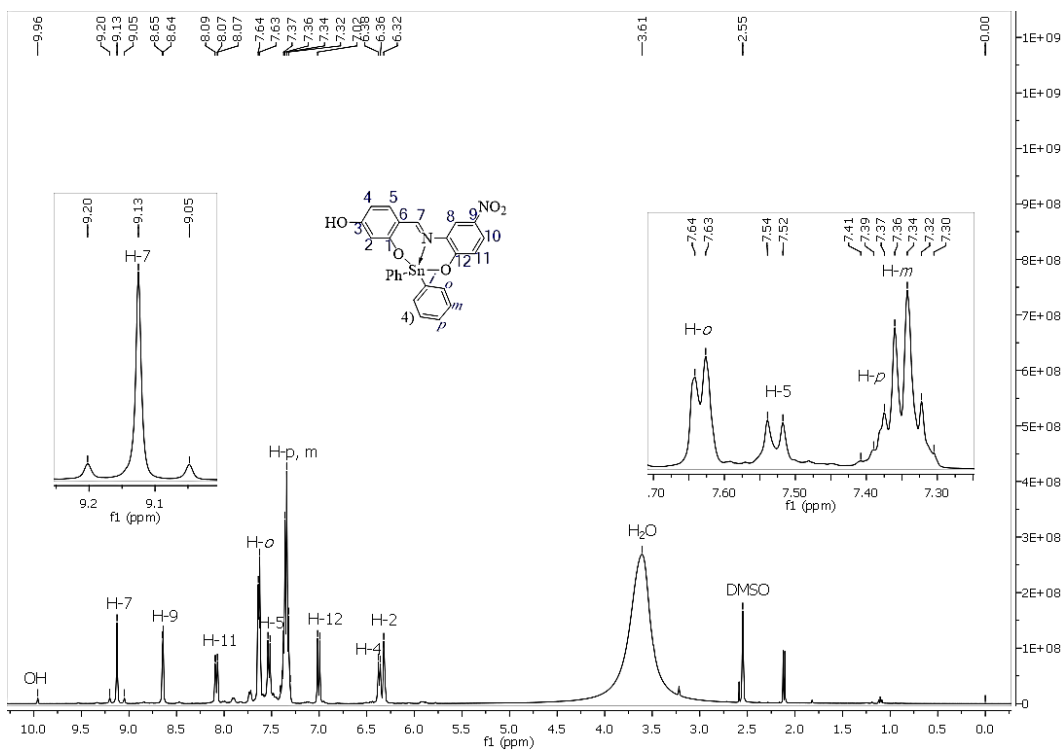

Figure S31. <sup>1</sup>H NMR (DMSO-*d*<sub>6</sub>) spectrum of compound 4.

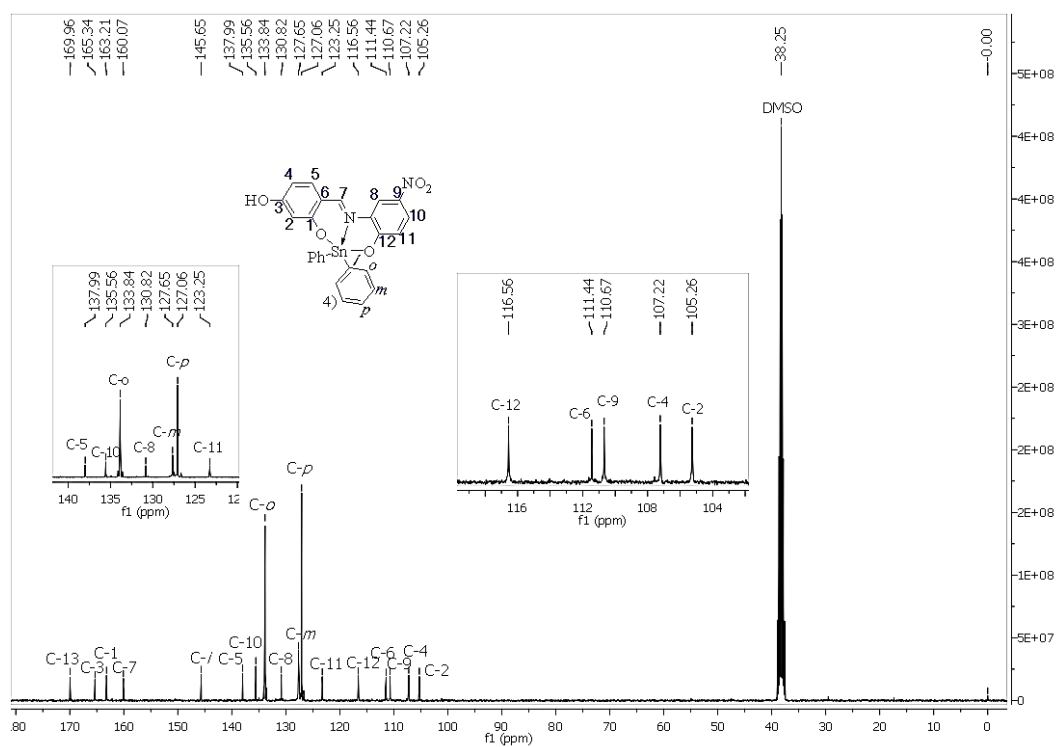

**Figure S32.**  $^{13}\text{C}$  NMR ( $\text{DMSO-}d_6$ ) spectrum of compound 4.

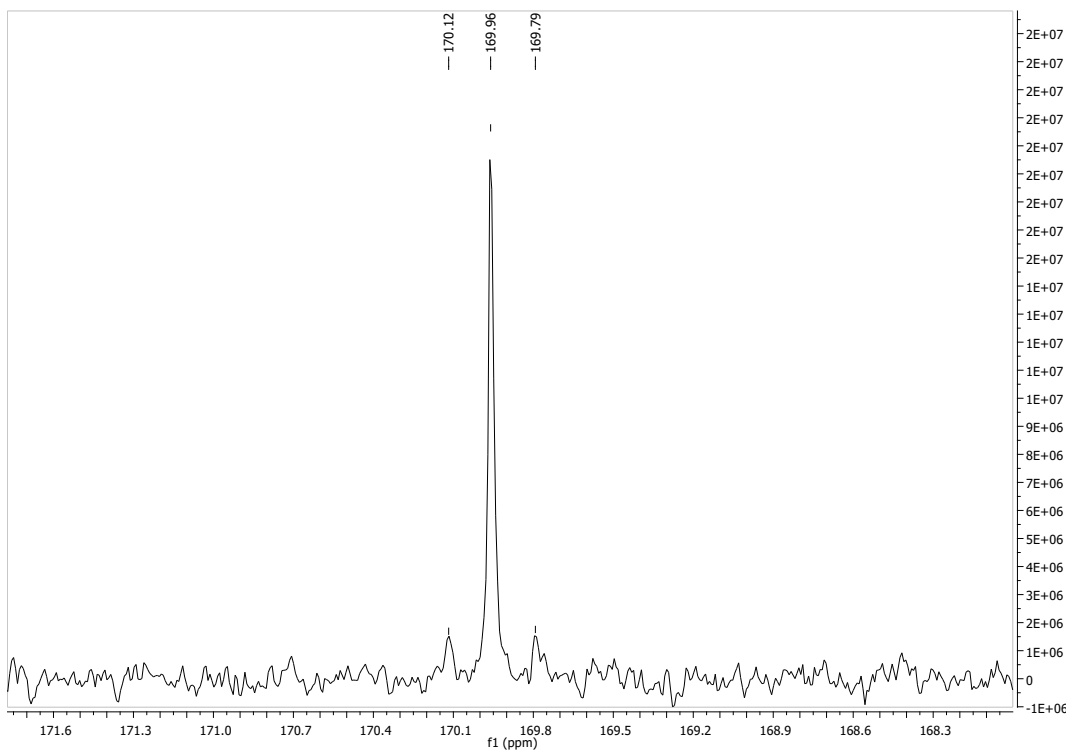

**Figure S33.**  $^{13}\text{C}$  NMR expansion spectrum of compound 4.

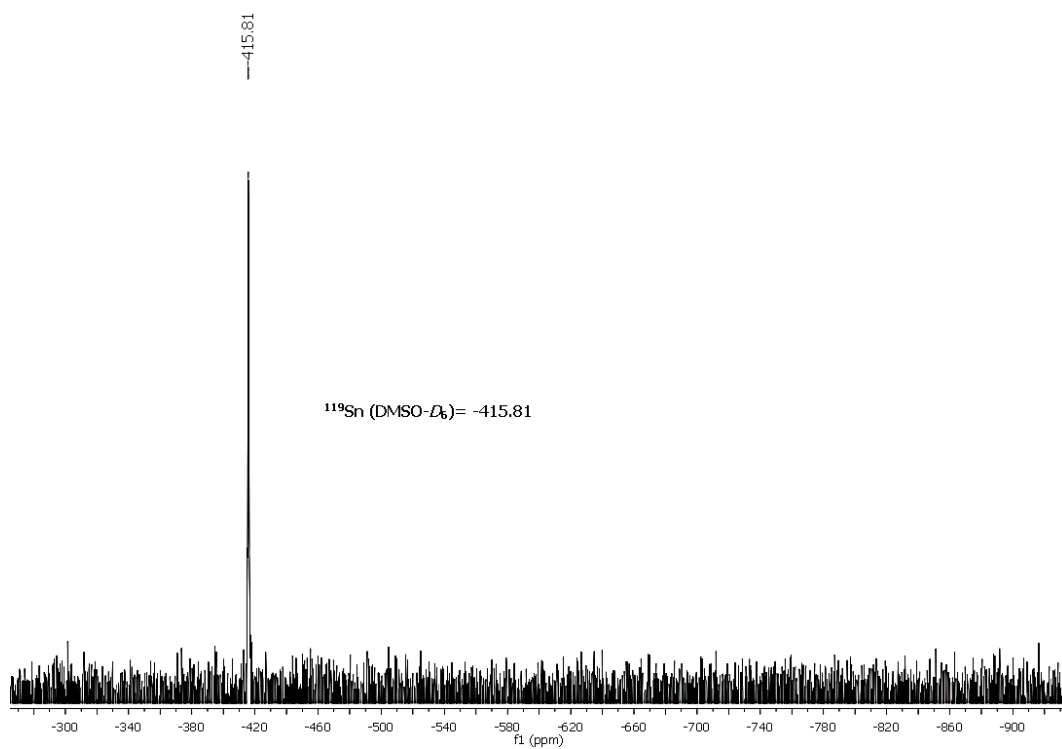

Figure S34.  $^{119}\text{Sn}$  NMR (DMSO- $d_6$ ) spectrum of compound 4.

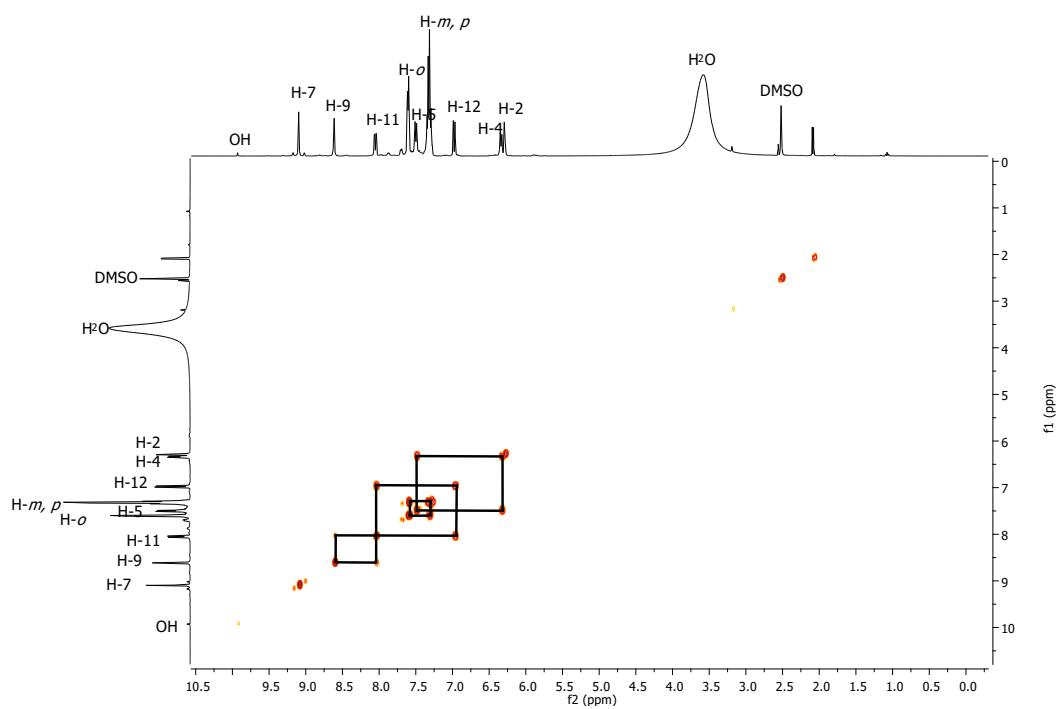

Figure S35. COSY correlation ( $\delta_{\text{H}}/\delta_{\text{H}}$ ) spectrum corresponding of compound 4.

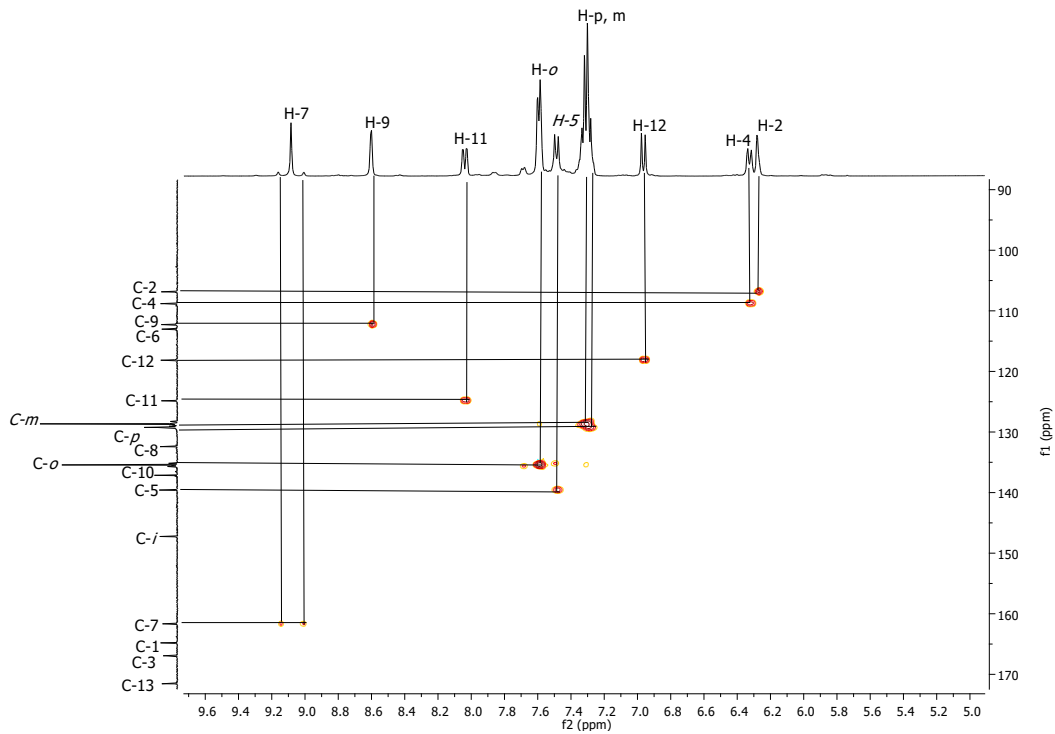

**Figure S36.** HSQC correlation ( $\delta\text{H}/\delta\text{C}$ ) spectrum corresponding of compound **4**.

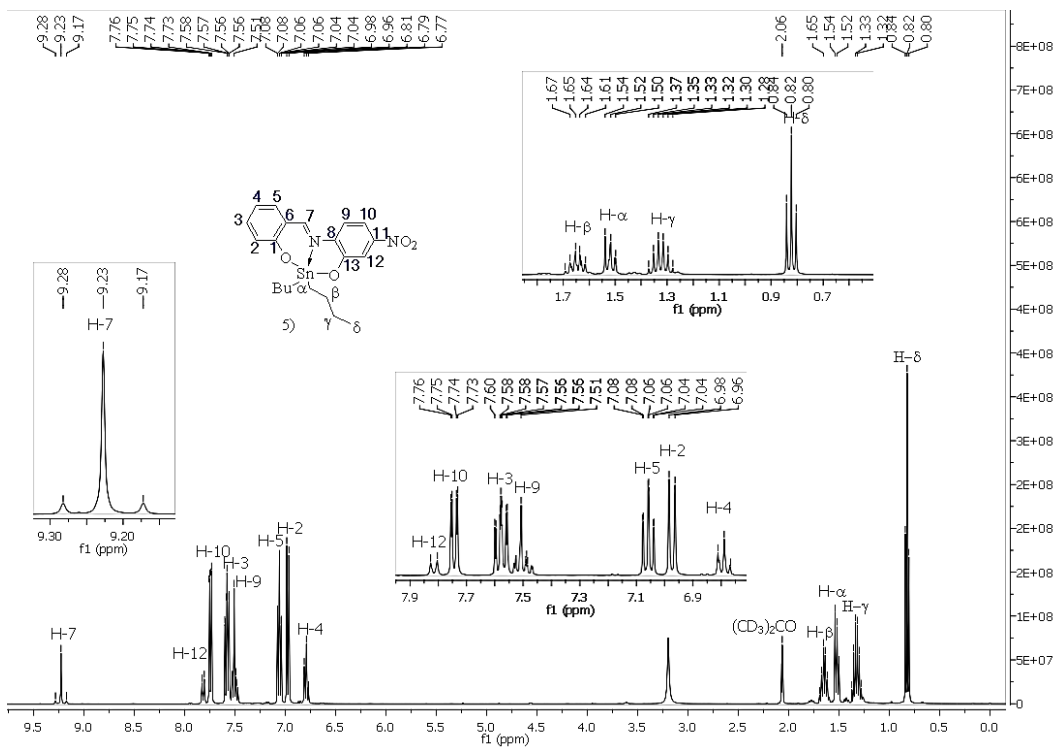

**Figure S37.**  $^1\text{H}$  NMR ( $(\text{CD}_3)_2\text{CO}$ ) spectrum of compound **5**.



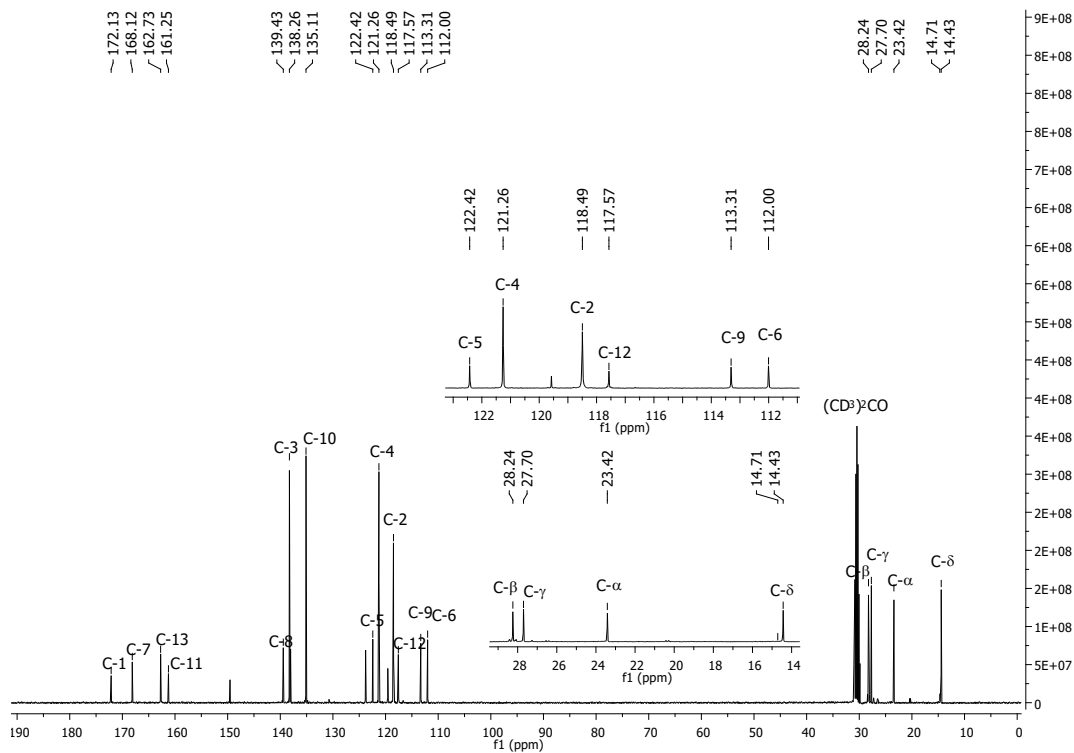

Figure S38.  $^{13}\text{C}$  NMR  $(\text{CD}_3)_2\text{CO}$  spectrum of compound 5.

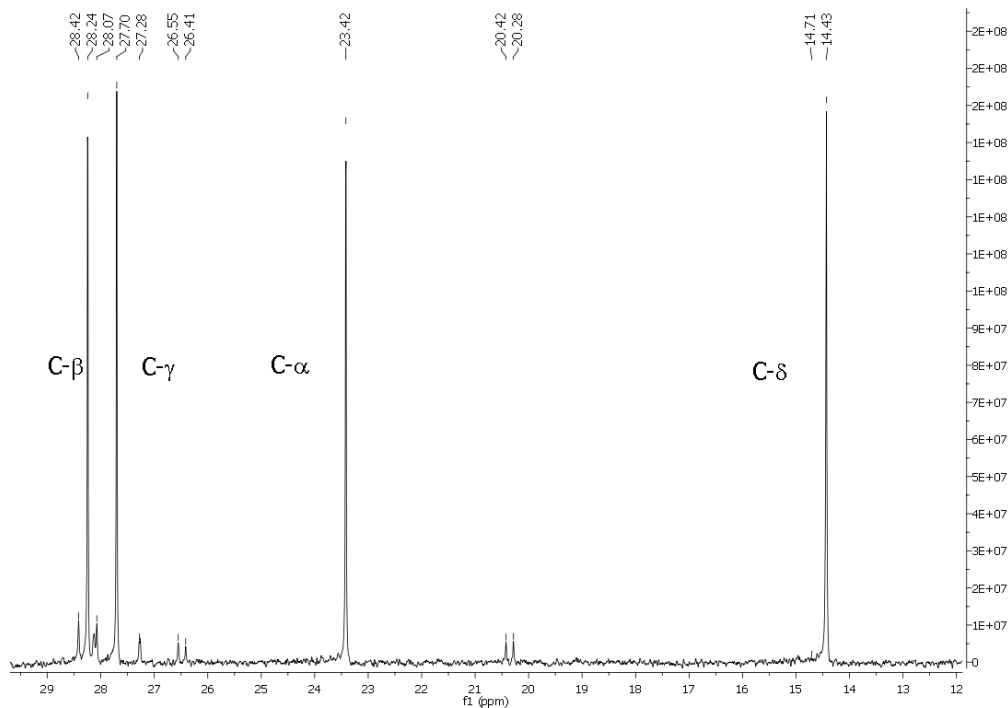

Figure S39.  $^{13}\text{C}$  NMR expansion spectrum of compound 5.

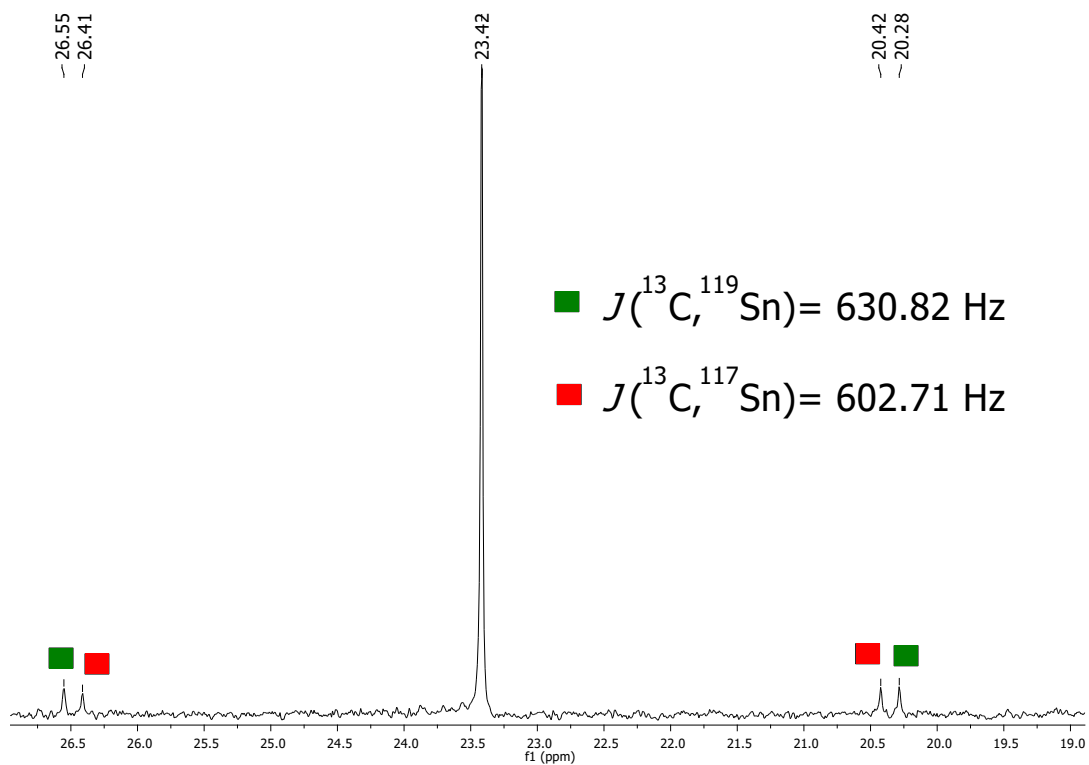

**Figure S40.** Coupling constant  $J(^{13}\text{C}, ^{119/117}\text{Sn})$  of compound **5**.

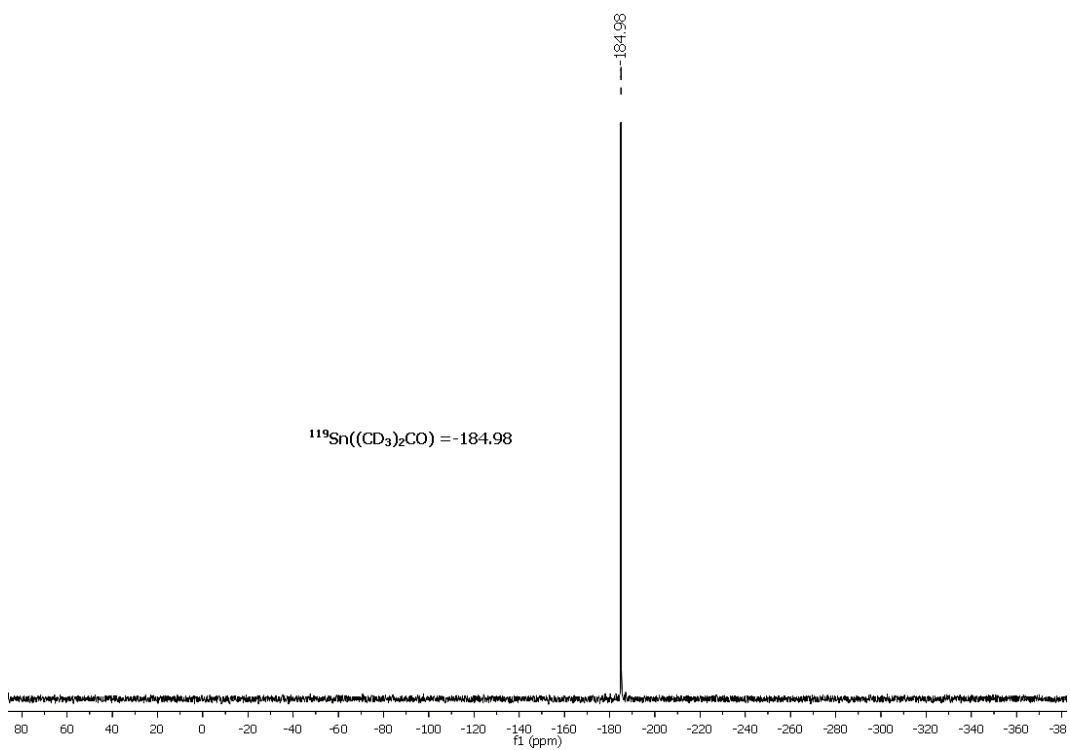

**Figure S41.**  $^{119}\text{Sn}$  NMR  $((\text{CD}_3)_2\text{CO})$  spectrum of compound **5**.

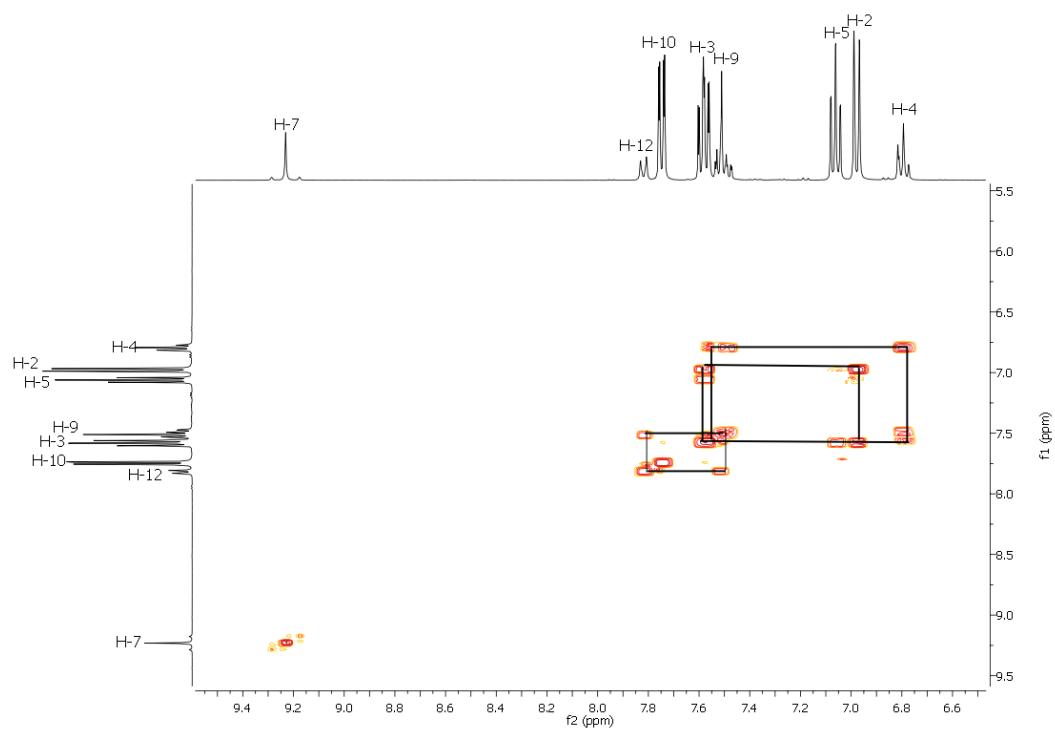

**Figure S42.** COSY correlation ( $\delta_{\text{H}}/\delta_{\text{H}}$ ) spectrum corresponding aromatic region of compound **5**.

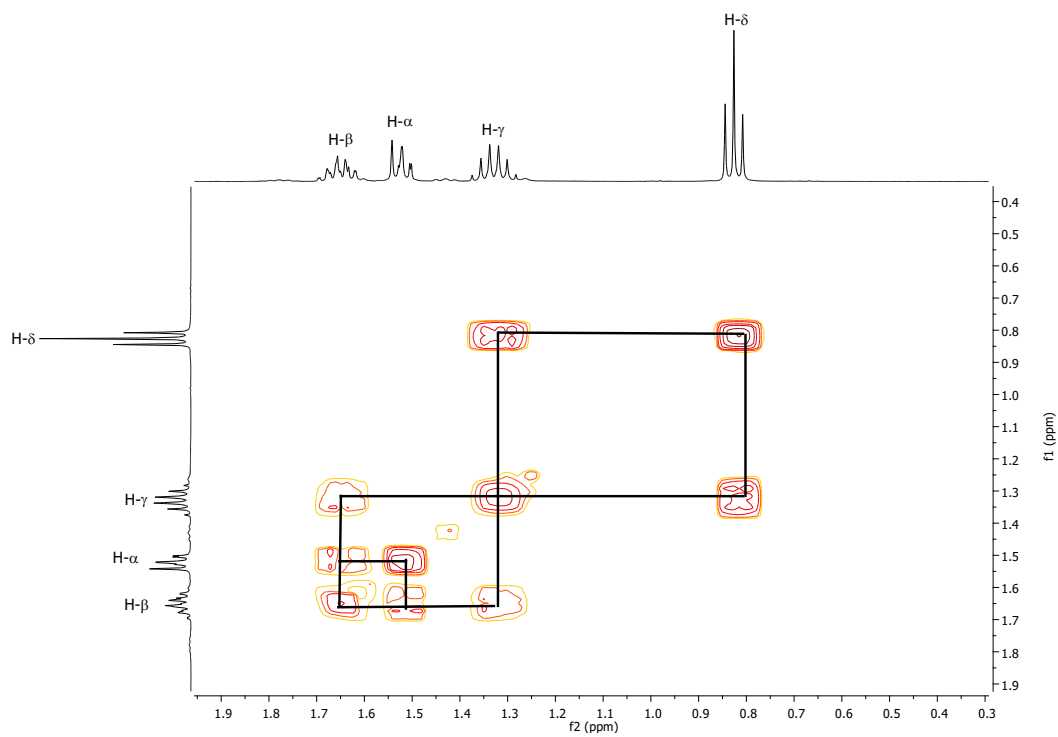

**Figure S43.** COSY correlation ( $\delta_{\text{H}}/\delta_{\text{H}}$ ) spectrum corresponding aliphatic region of **5**.

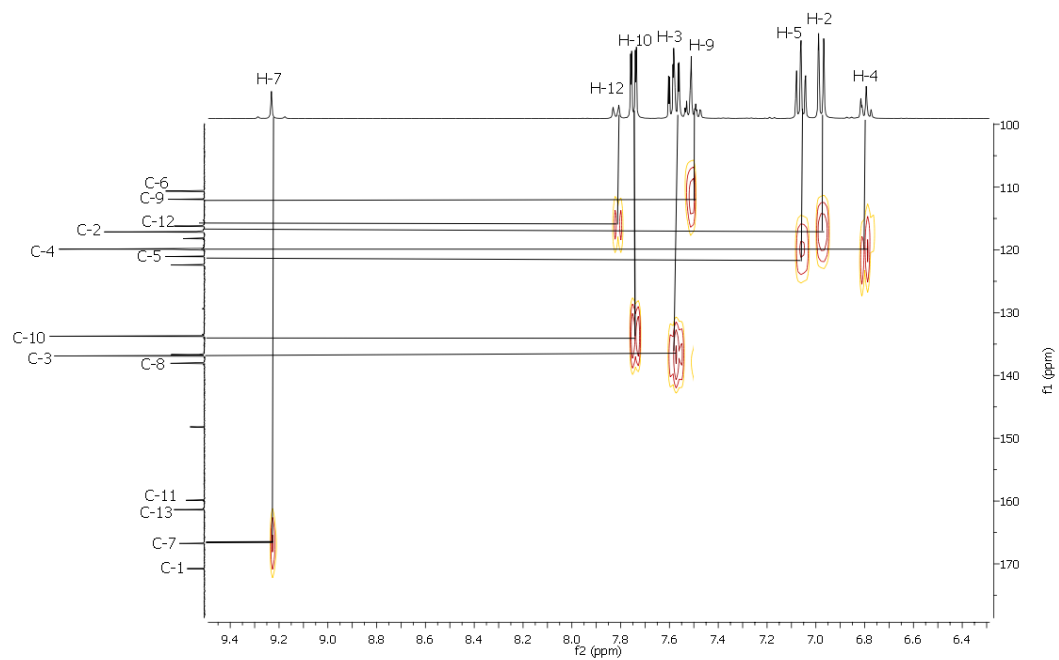

**Figure S44.** HSQC correlation ( $\delta H/\delta C$ ) spectrum corresponding aromatic region of compound **5**.

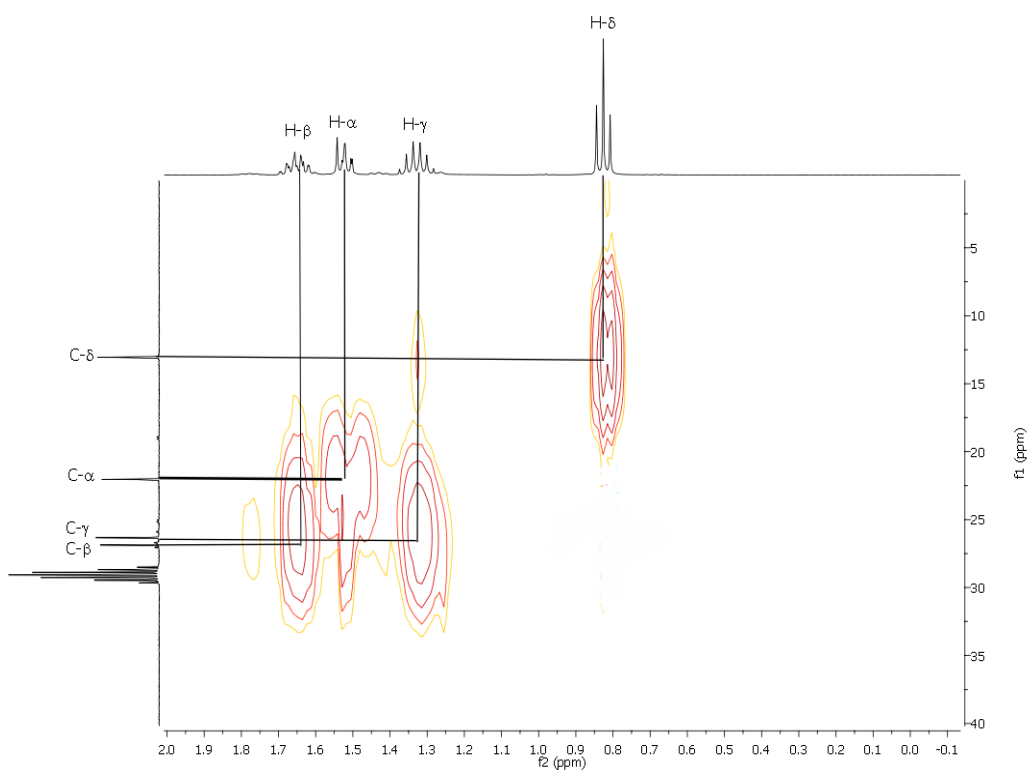

**Figure S45.** HSQC correlation ( $\delta H/\delta C$ ) spectrum corresponding aliphatic region of compound **5**.

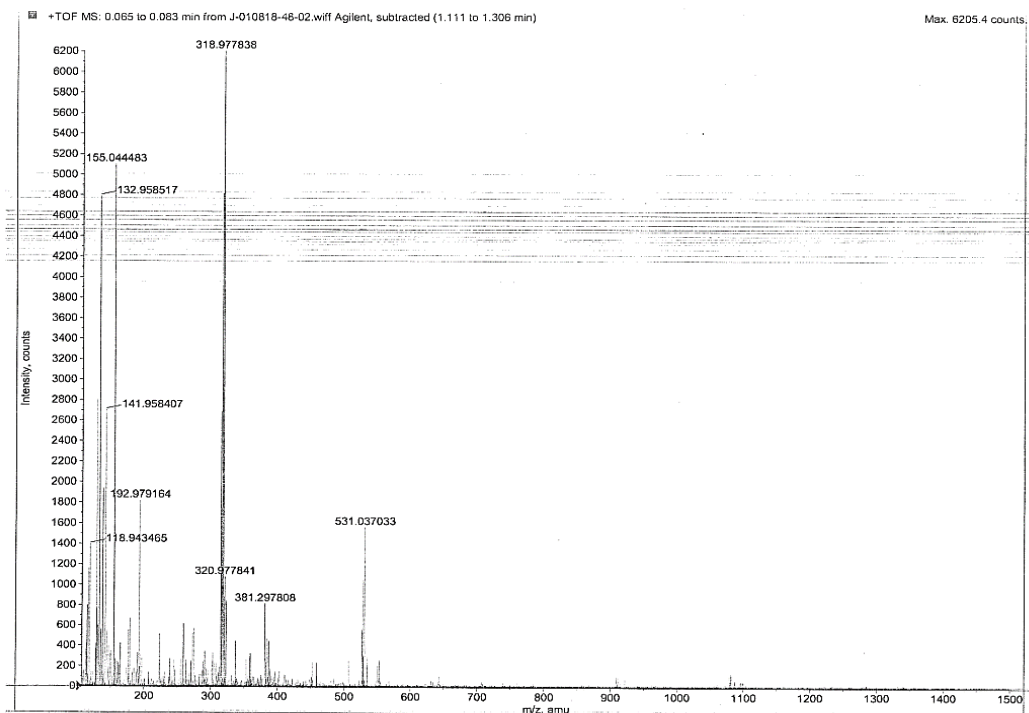

Figure S46. Mass spectrum of compound 6.

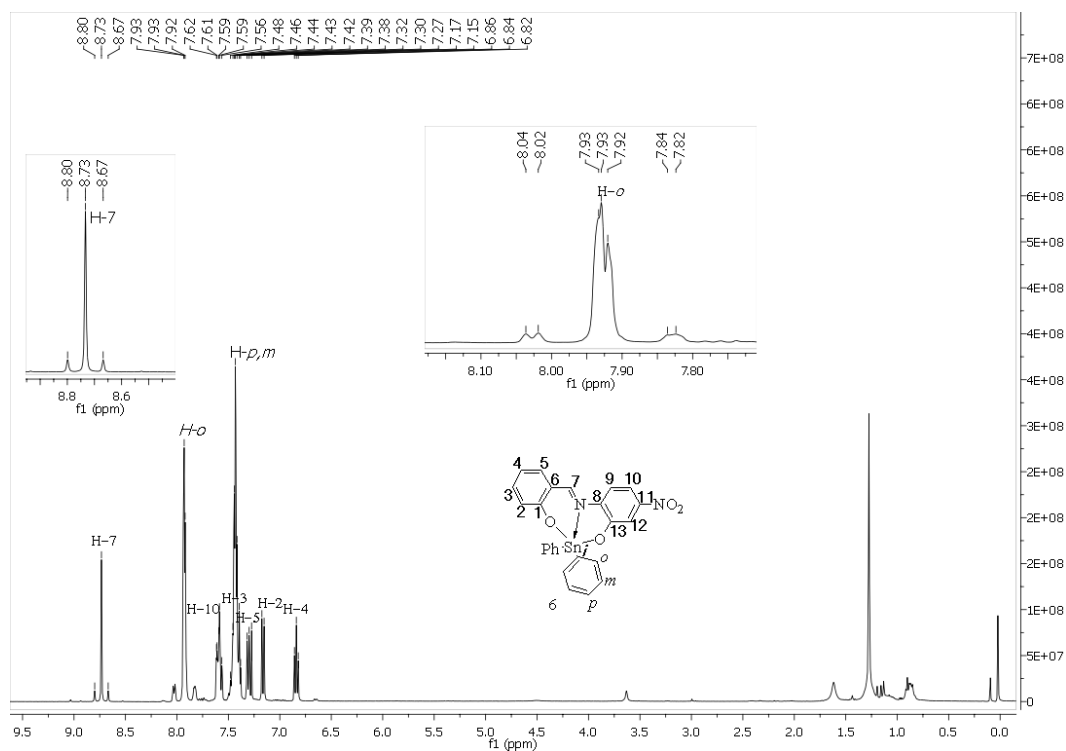

Figure S47. <sup>1</sup>H NMR (CDCl<sub>3</sub>) spectrum of compound 6.

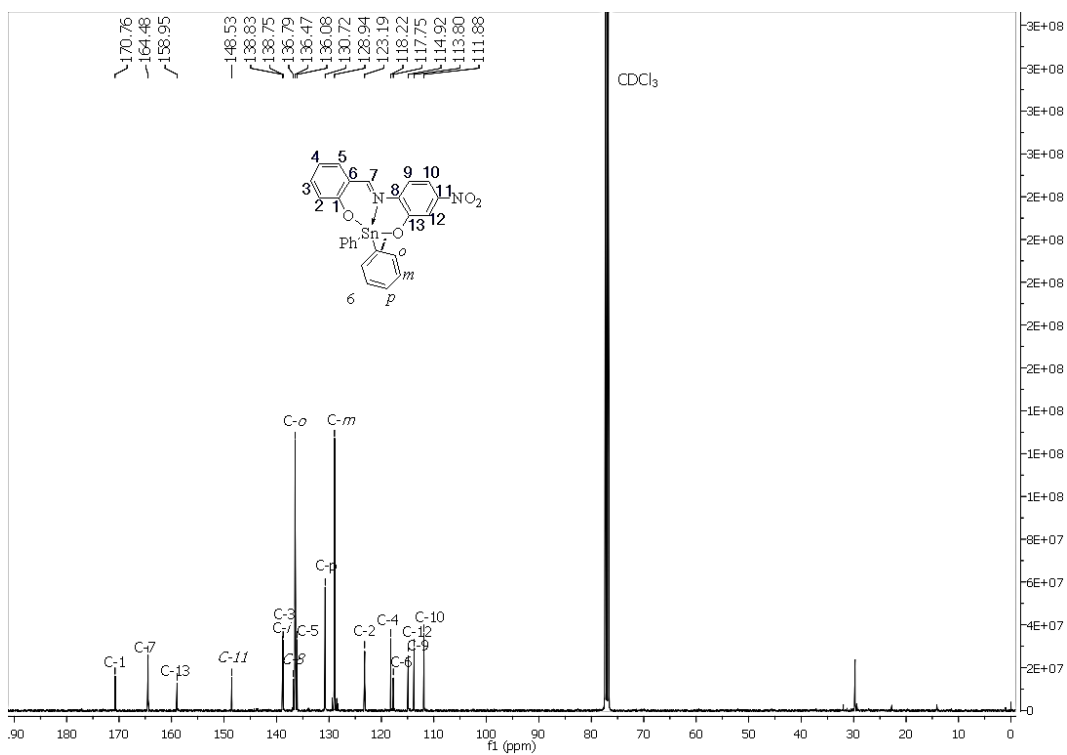

**Figure S48.**  $^{13}\text{C}$  NMR ( $\text{CDCl}_3$ ) spectrum of compound **6**.

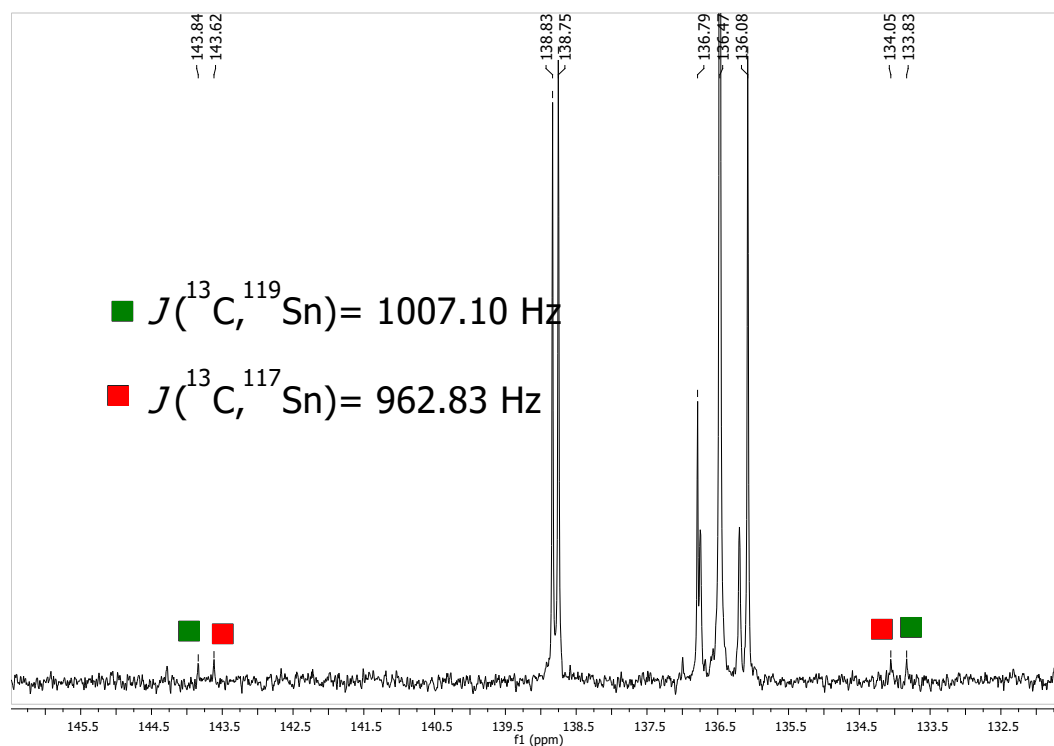

**Figure S49.** Coupling constant  $J(^{13}\text{C}, ^{119/117}\text{Sn})$  of compound **6**.

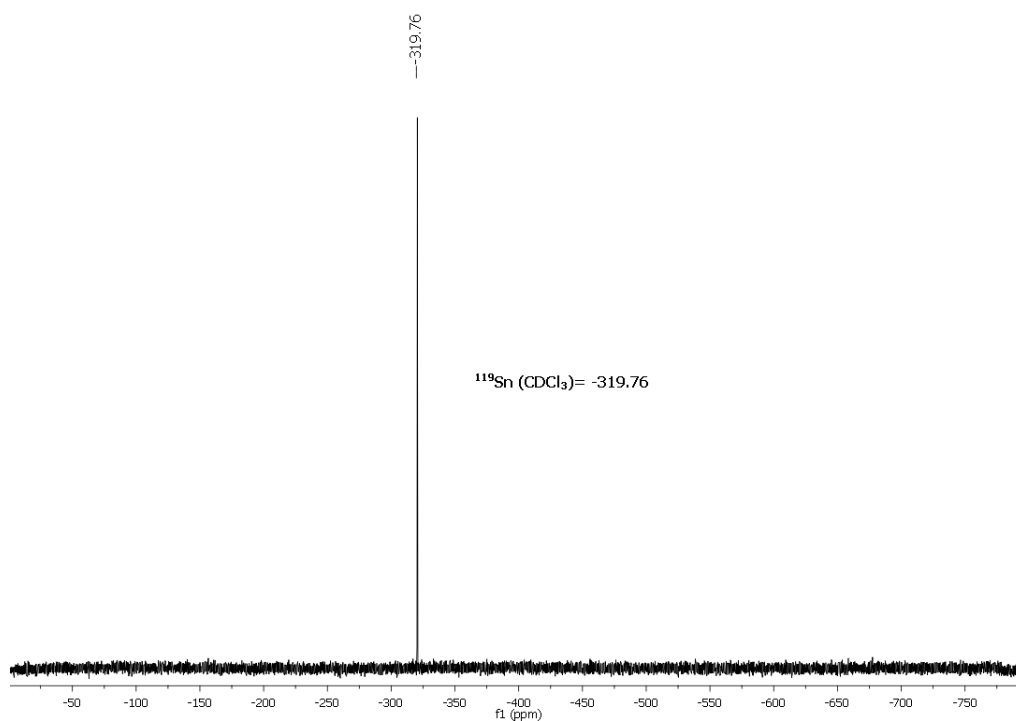

**Figure S50.**  $^{119}\text{Sn}$  NMR ( $\text{CDCl}_3$ ) spectrum of compound **6**.

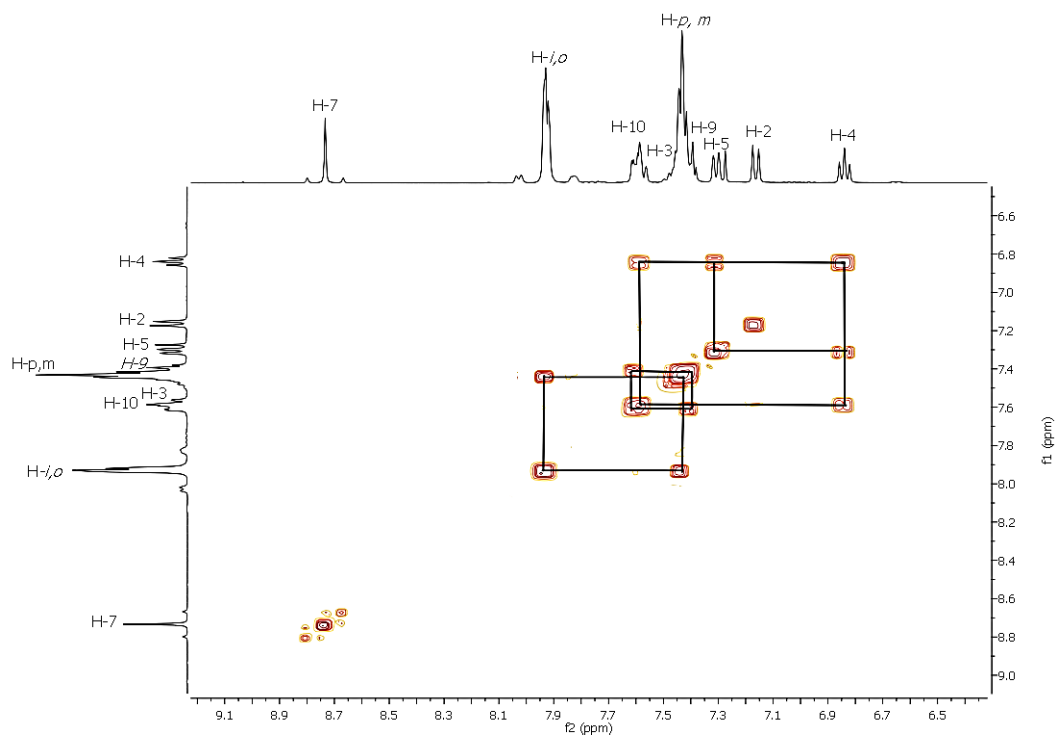

**Figure S51.** COSY correlation ( $\delta_{\text{H}}/\delta_{\text{H}}$ ) spectrum corresponding of compound **6**.

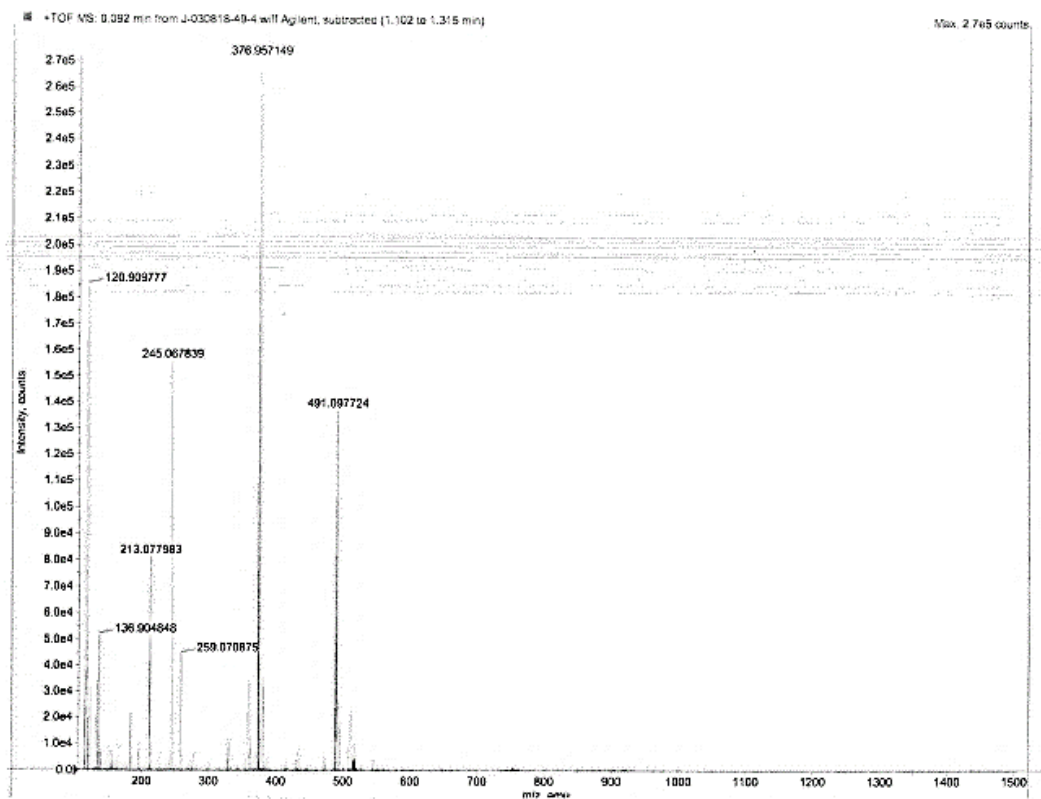

Figure S52. Mass spectrum of compound 7.

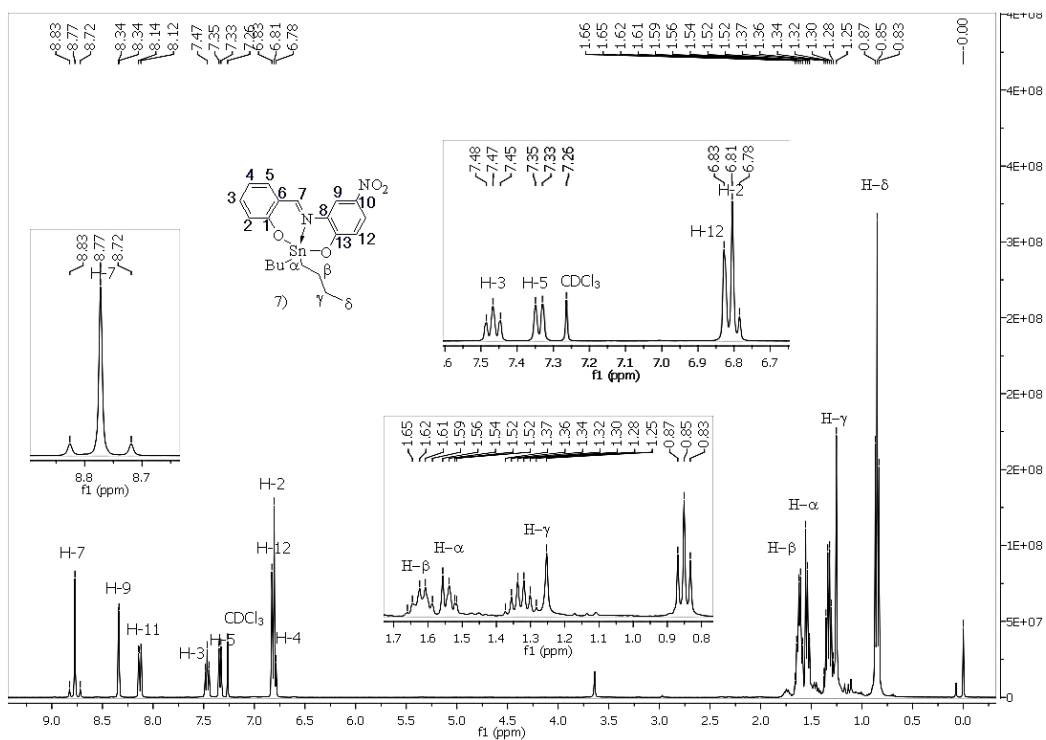

Figure S53. <sup>1</sup>H NMR (CDCl<sub>3</sub>) spectrum of compound 7.



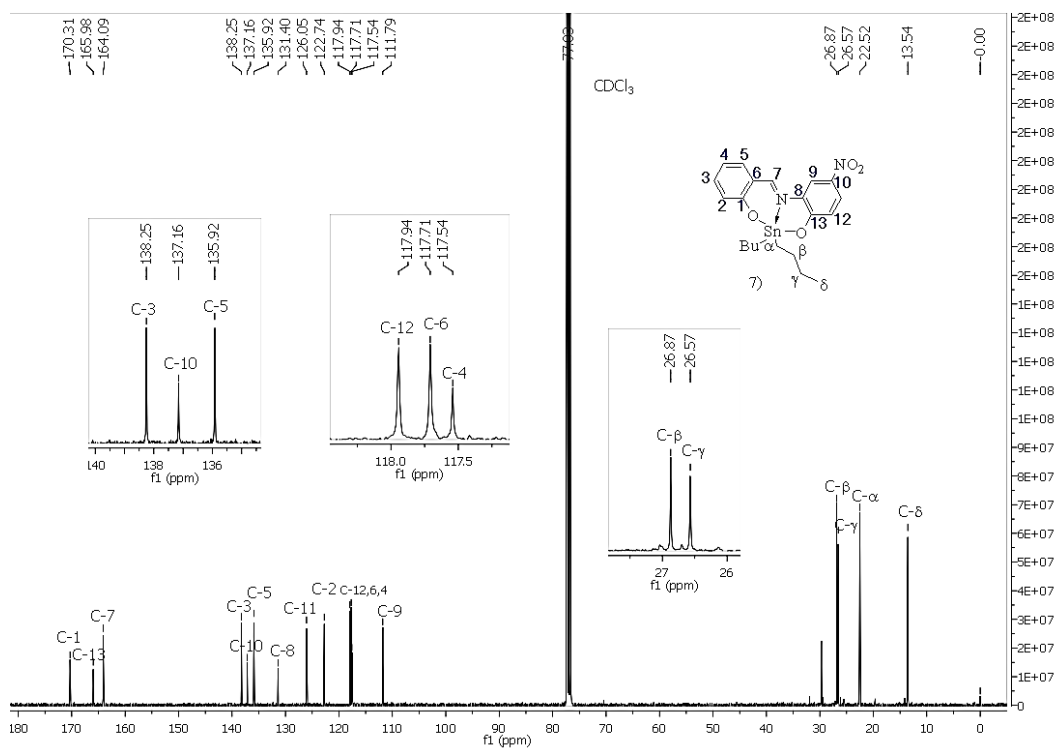

Figure S54.  $^{13}\text{C}$  NMR ( $\text{CDCl}_3$ ) spectrum of compound 7.

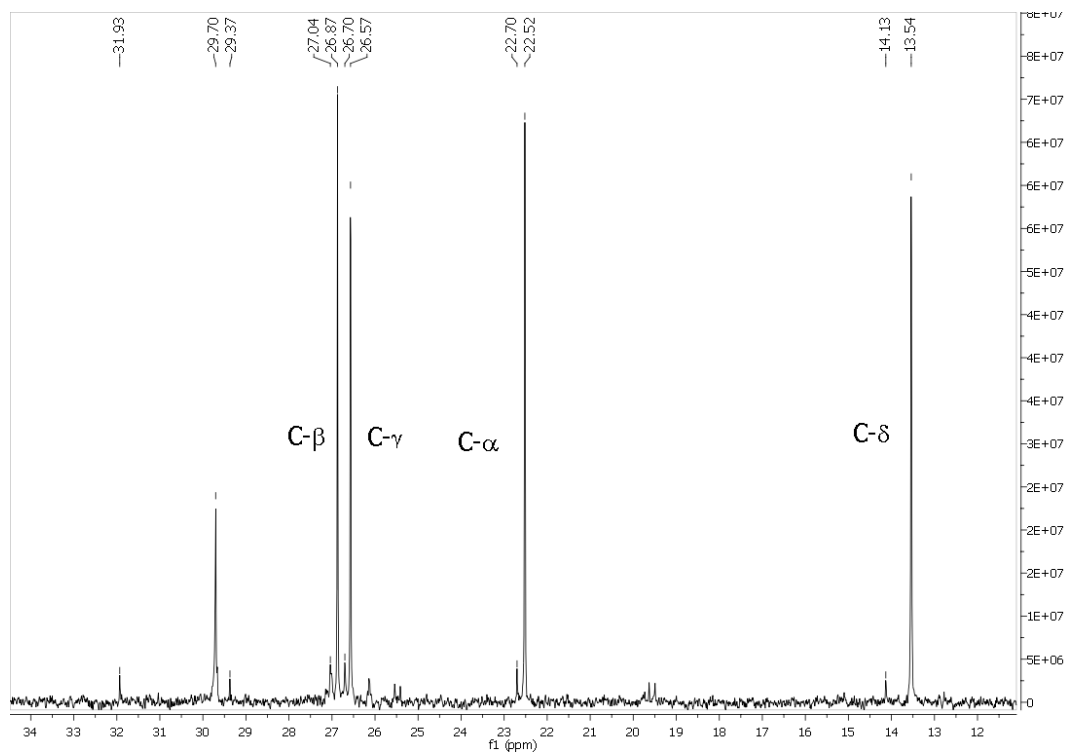

Figure S55.  $^{13}\text{C}$  NMR expansion spectrum of compound 7.

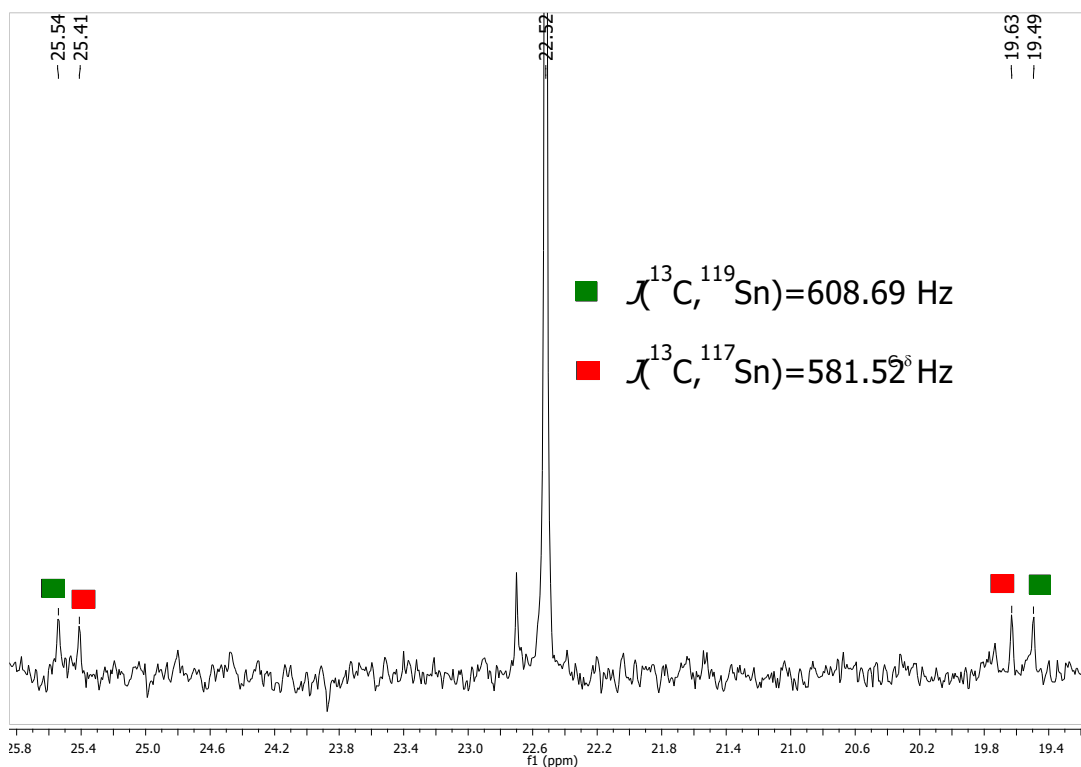

Figure S56. Coupling constant  $J(^{13}\text{C}, ^{119/117}\text{Sn})$  of compound 7.

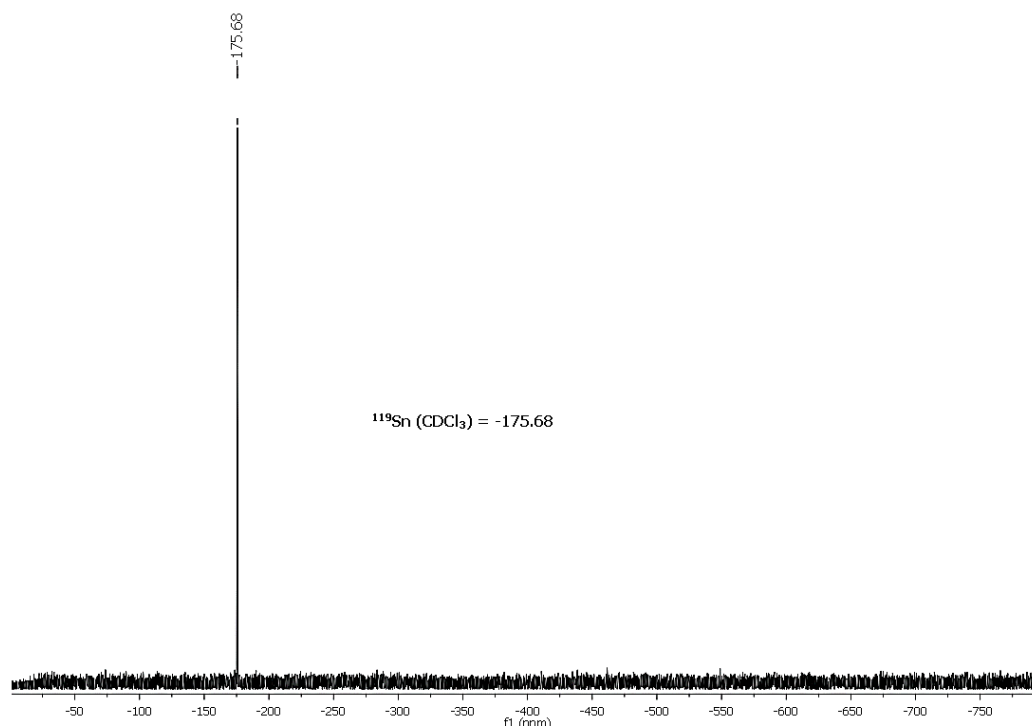

Figure S57.  $^{119}\text{Sn}$  NMR ( $\text{CDCl}_3$ ) spectrum of compound 7.

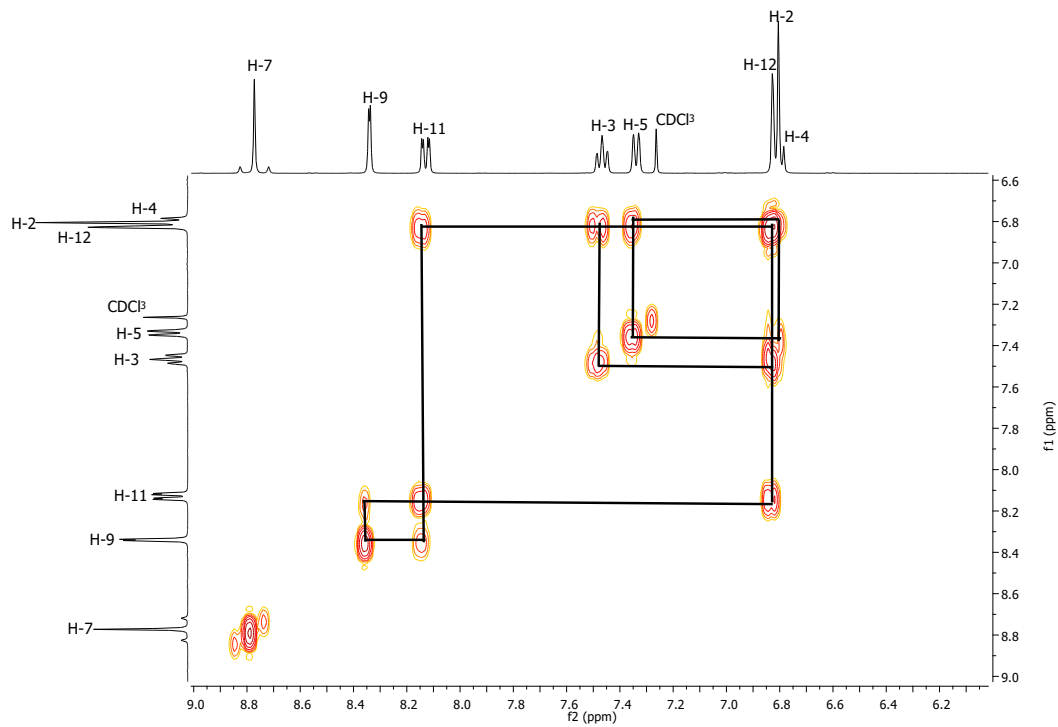

**Figure S58.** COSY correlation ( $\delta_{\text{H}}/\delta_{\text{H}}$ ) spectrum corresponding aromatic region of compound 7.

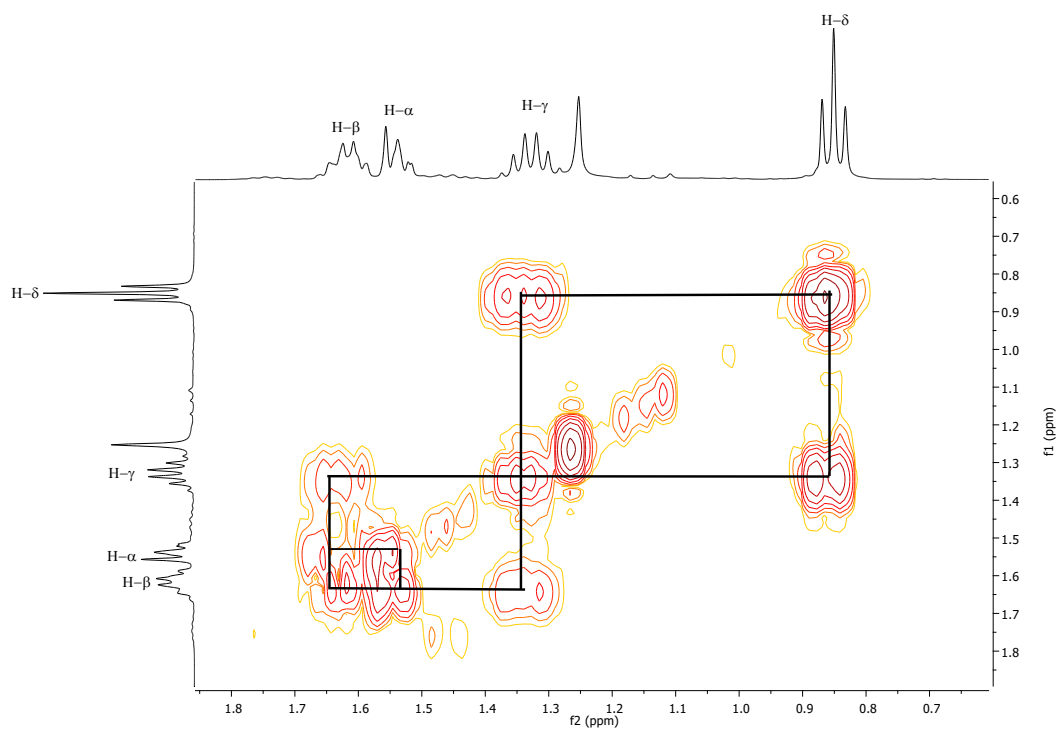

**Figure S59.** COSY correlation ( $\delta_{\text{H}}/\delta_{\text{H}}$ ) spectrum corresponding aliphatic region of compound 7.

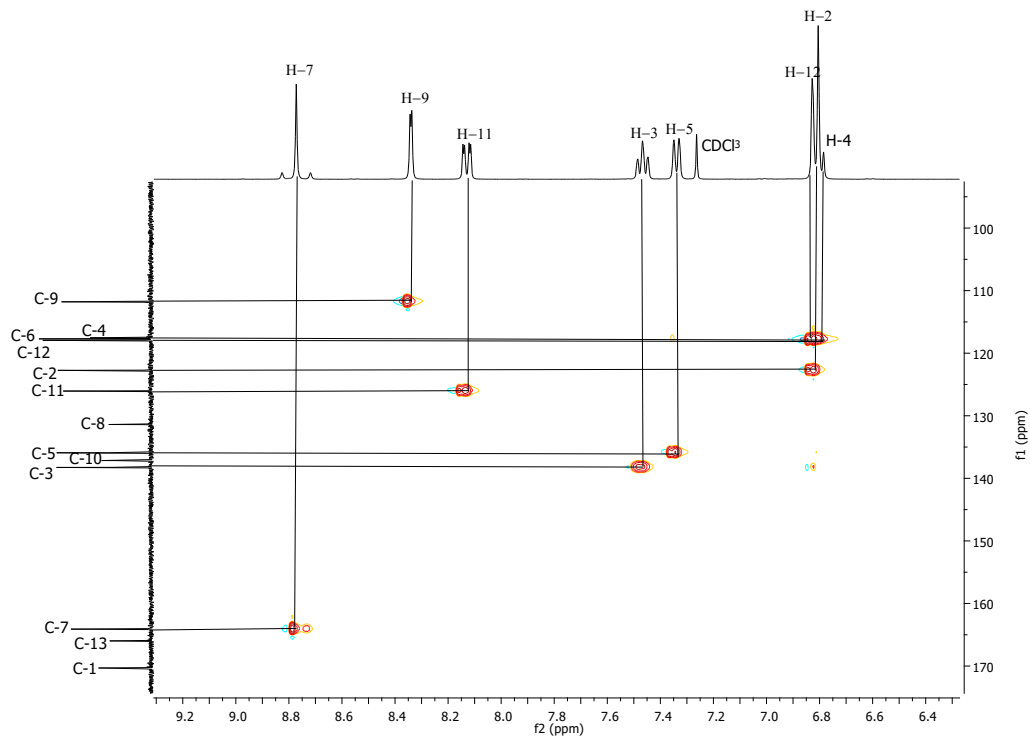

**Figure S60.** HSQC correlation ( $\delta H/\delta C$ ) spectrum corresponding aromatic region of compound 7.

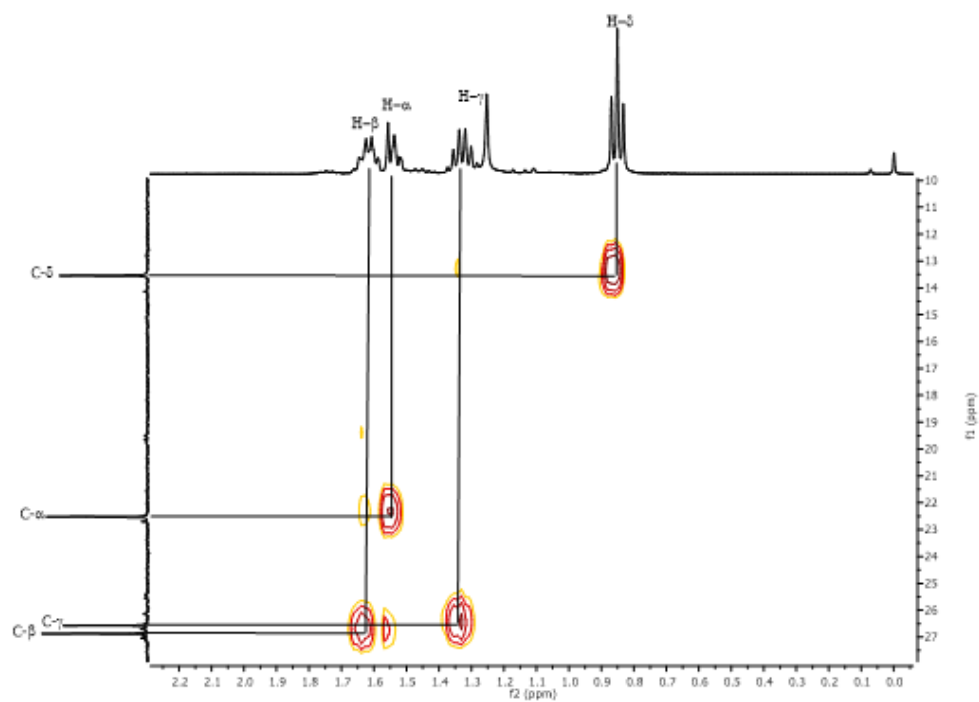

**Figure S61.** HSQC correlation ( $\delta H/\delta C$ ) spectrum corresponding aliphatic region of compound 7.

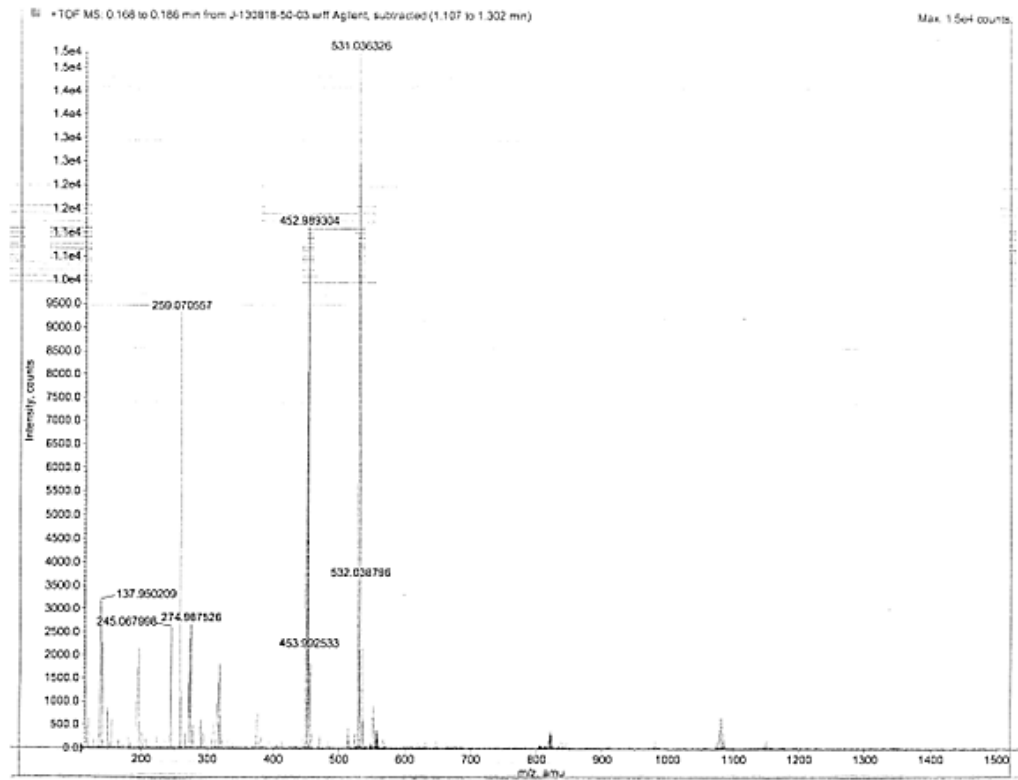

Figure S62. Mass spectrum of compound 8.

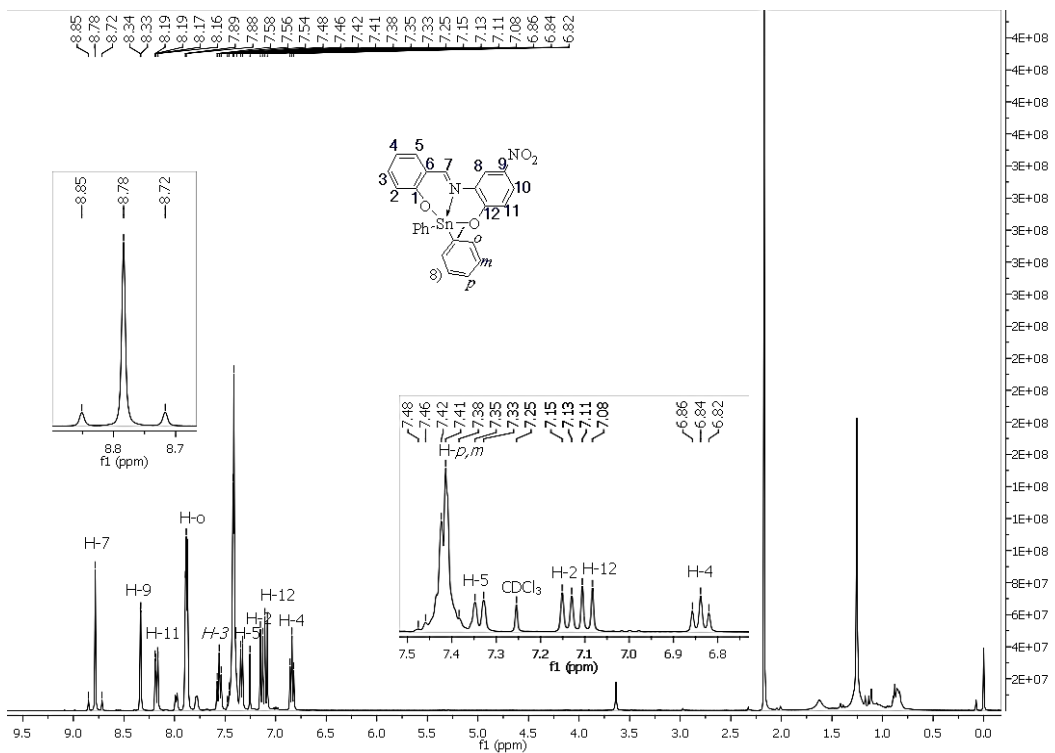

Figure S63. <sup>1</sup>H NMR (CDCl<sub>3</sub>) spectrum of compound 8.

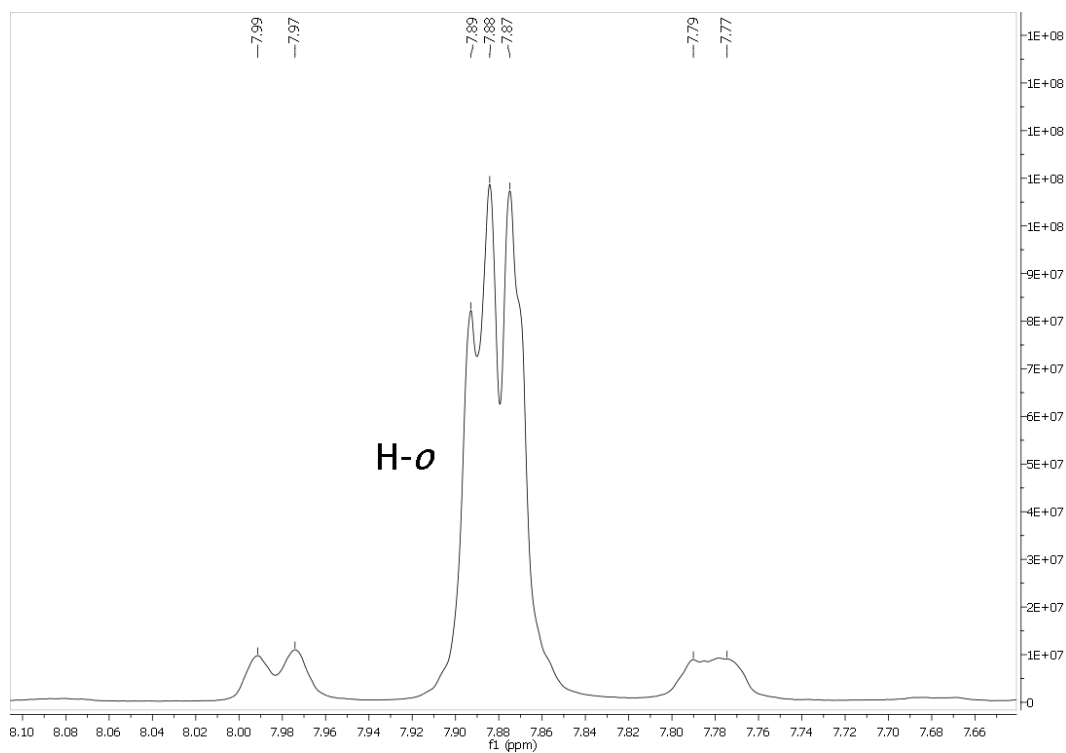

Figure S64.  $^1\text{H}$  NMR H-o spectrum of compound 8.

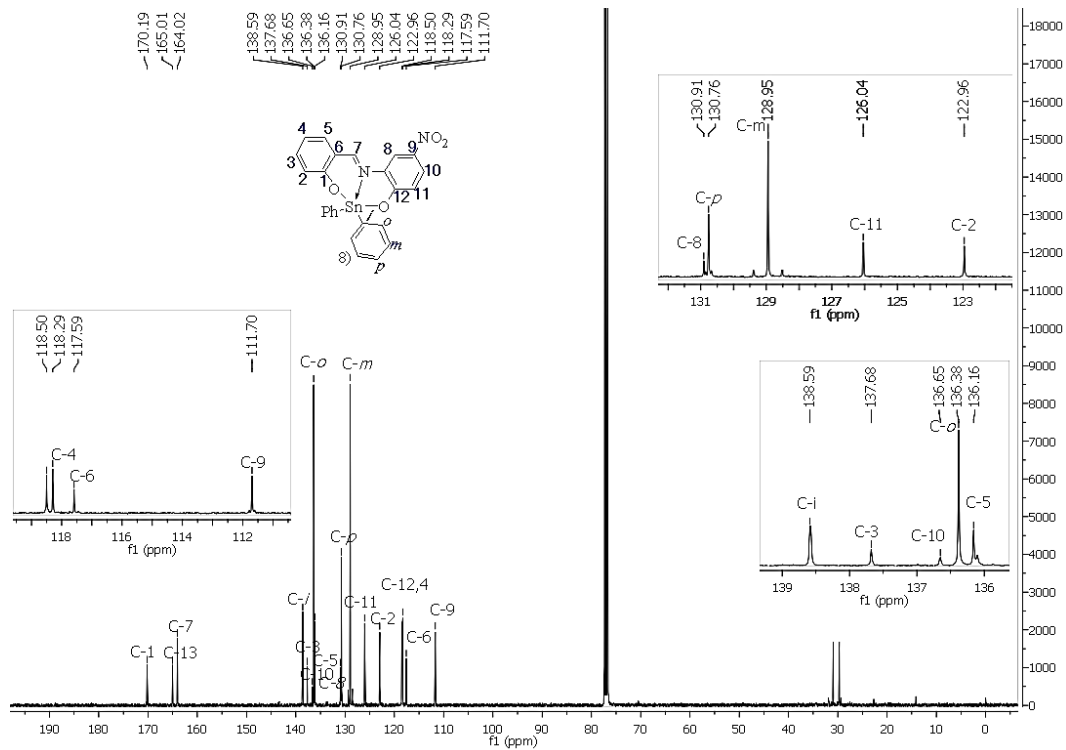

Figure S65.  $^{13}\text{C}$  NMR ( $\text{CDCl}_3$ ) spectrum of compound 8.

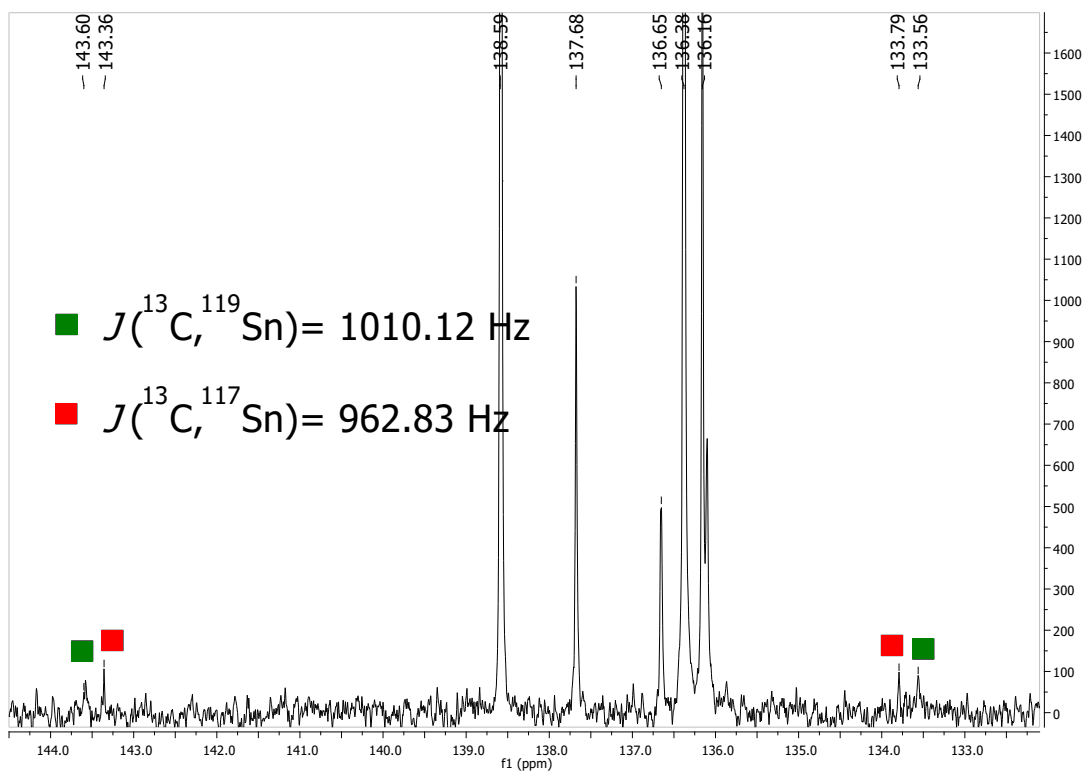

Figure S66. Coupling constant  $J(^{13}\text{C}, ^{119/117}\text{Sn})$  of compound **8**

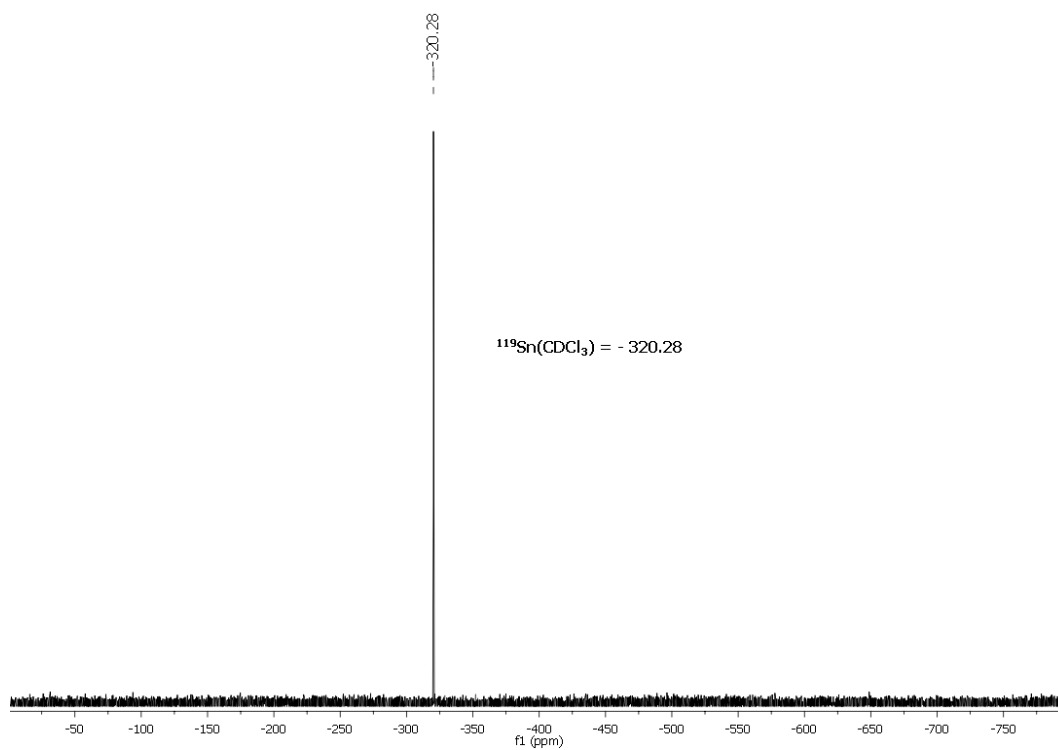

Figure S67.  $^{119}\text{Sn}$  NMR ( $\text{CDCl}_3$ ) spectrum of compound **8**.

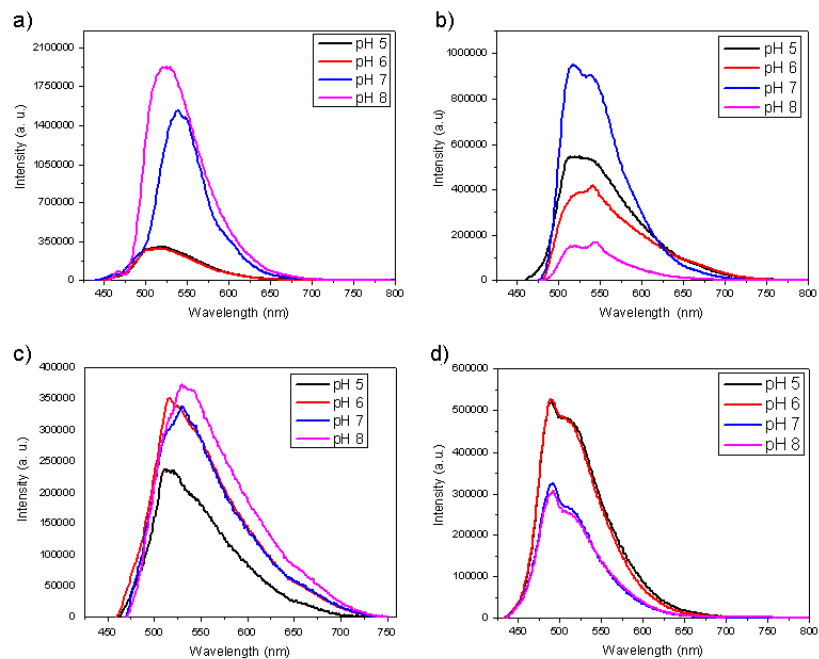

**Figure S68.** Emission spectra of halochromism for compound **1 a)**, **2 b)**, **3 c)**, and **4 d)**.

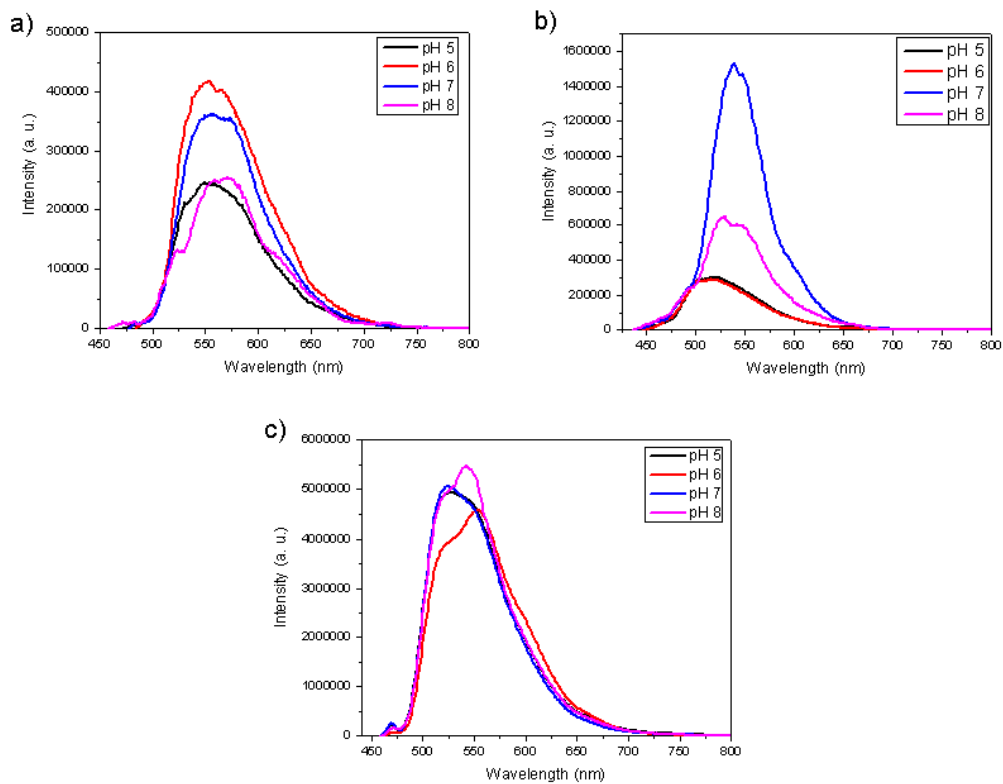

**Figure S69.** Emission spectra of halochromism for compounds **6 a)**, **7 b)** and **8 c)**.



**Table S4.** Structural parameters obtained through X-ray diffraction structure (**1<sub>c</sub>**) and theoretically calculated (**1A<sup>0</sup><sub>Theo</sub>**) to compound **1**. Where  $\alpha$  and  $\gamma$  are bond angles in  $^{\circ}$ , and  $d$  is the bond lengths in  $\text{\AA}$ .

| System                       | <b>1<sub>c</sub></b> | <b>1A<sup>0</sup><sub>Theo</sub></b> |
|------------------------------|----------------------|--------------------------------------|
| $d(\text{O3-H})$             | 0.708                | 0.962                                |
| $d(\text{N-Sn})$             | 2.174                | 2.237                                |
| $d(\text{Sn-O1})$            | 2.118                | 2.138                                |
| $d(\text{Sn-O2})$            | 2.182                | 2.122                                |
| $d(\text{Sn-C18})$           | 2.119                | 2.161                                |
| $d(\text{Sn-C14})$           | 2.105                | 2.157                                |
| $d(\text{C7-N1})$            | 1.320                | 1.297                                |
| $d(\text{C8-N1})$            | 1.415                | 1.409                                |
| $d(\text{C1-O1})$            | 1.311                | 1.312                                |
| $\alpha(\text{O1-Sn1-O2})$   | 154.93 $^{\circ}$    | 156.68                               |
| $\alpha(\text{C18-Sn1-N1})$  | 116.90 $^{\circ}$    | 117.79                               |
| $\alpha(\text{C14-Sn1-N1})$  | 105.10 $^{\circ}$    | 111.59                               |
| $\alpha(\text{C14-Sn1-C18})$ | 137.95 $^{\circ}$    | 130.60                               |
| $\alpha(\text{C18-Sn1-O1})$  | 91.00 $^{\circ}$     | 94.69                                |
| $\alpha(\text{C18-Sn1-O2})$  | 94.27 $^{\circ}$     | 94.27                                |
| $\alpha(\text{C14-Sn1-O1})$  | 93.59 $^{\circ}$     | 93.13                                |
| $\alpha(\text{C14-Sn1-O2})$  | 93.71 $^{\circ}$     | 97.25                                |
| $\alpha(\text{O1-Sn1-N1})$   | 81.22 $^{\circ}$     | 81.63                                |
| $\alpha(\text{O2-Sn1-N1})$   | 74.54 $^{\circ}$     | 75.14                                |
| $\gamma(\text{C7-N1-C8-C9})$ | 30.61 $^{\circ}$     | 21.07                                |

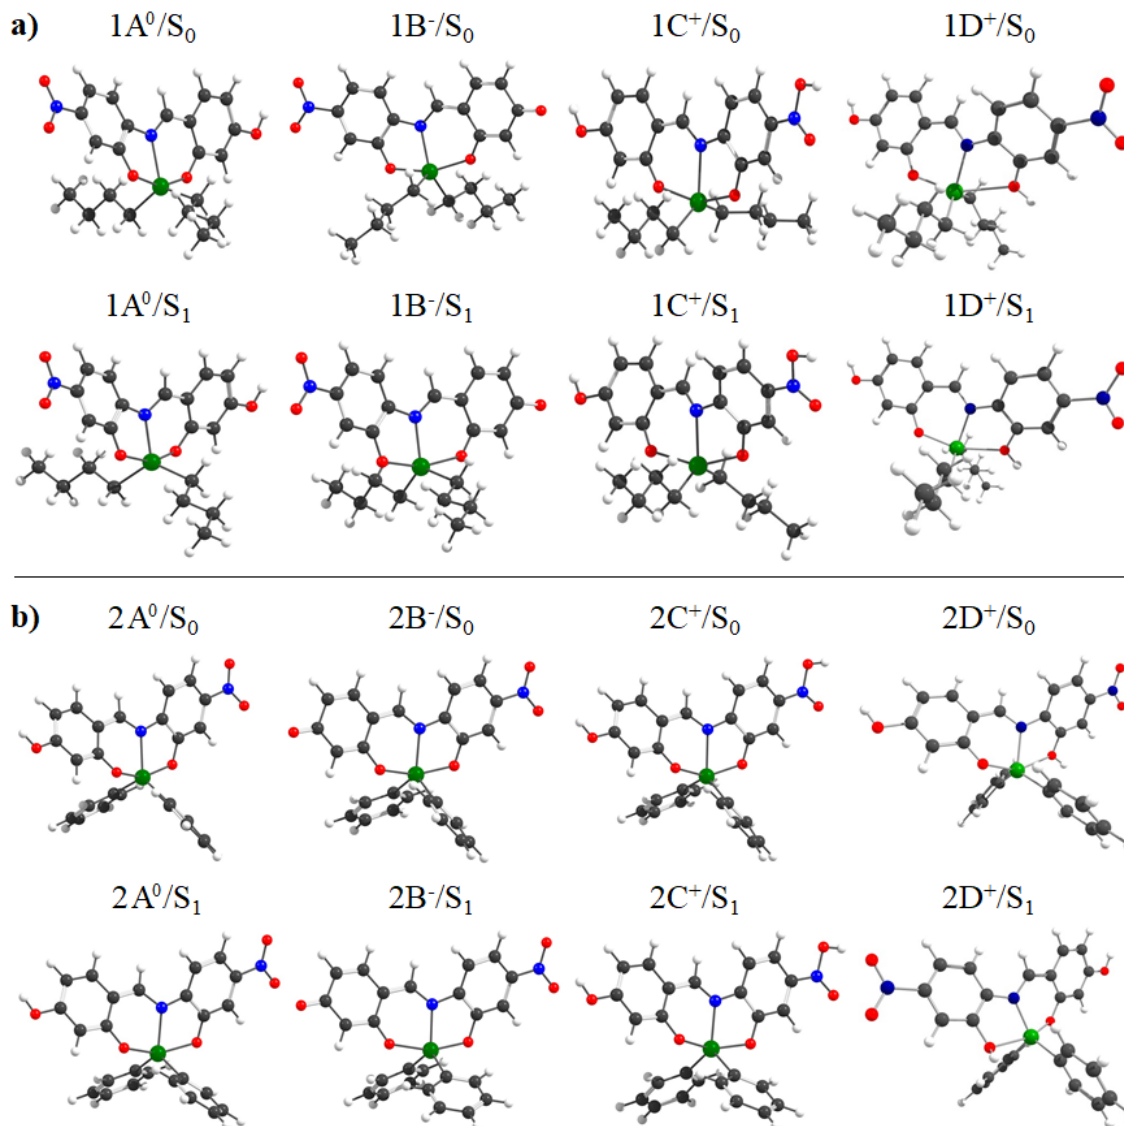

**Figure. S70.** Optimized structures of **1** and **2** in the ground ( $S_0$ ) and the first-singlet excited ( $S_1$ ) state: neutral ( $A^0$ ), basic ( $B^-$ ) and acid ( $C^+$  and  $D^+$ ) media. Atoms are denoted with red (oxygen), blue (nitrogen), gray (carbon), light gray (hydrogen), and green (tin) spheres.

**Table S5.** Torsion angle  $\gamma(\text{C}_7\text{-N}_1\text{-C}_8\text{-C}_9)$  and bond lengths  $d(\text{Sn-O}_2)$  (in Å).

| System                                                         | A <sup>0</sup> /S <sub>0</sub> | A <sup>0</sup> /S <sub>1</sub> | B <sup>-</sup> /S <sub>0</sub> | B <sup>-</sup> /S <sub>1</sub> | C <sup>+</sup> /S <sub>0</sub> | C <sup>+</sup> /S <sub>1</sub> | D <sup>+</sup> /S <sub>0</sub> | D <sup>+</sup> /S <sub>1</sub> |
|----------------------------------------------------------------|--------------------------------|--------------------------------|--------------------------------|--------------------------------|--------------------------------|--------------------------------|--------------------------------|--------------------------------|
| <b>1</b> $\gamma(\text{C}_7\text{-N}_1\text{-C}_8\text{-C}_9)$ | 30.61°                         | 26.04°                         | 0.25°                          | 10.18°                         | -0.70°                         | 34.24°                         | 31.6°                          | 17.9°                          |
| <b>2</b> $\gamma(\text{C}_7\text{-N}_1\text{-C}_8\text{-C}_9)$ | 21.87°                         | 29.78°                         | 11.65°                         | 30.17°                         | 18.87°                         | 9.93°                          | 30.8°                          | 16.0°                          |
| <b>1</b> $d(\text{Sn-O}_2)$                                    | 2.121                          | 2.098                          | 2.147                          | 2.063                          | 2.134                          | 2.126                          | 2.653                          | 2.434                          |
| <b>2</b> $d(\text{Sn-O}_2)$                                    | 2.115                          | 2.274                          | 2.126                          | 2.066                          | 2.135                          | 2.087                          | 2.611                          | 2.480                          |

**Table S6.** Singlet→Singlet absorption data in compounds **1** and **2** in the neutral (A<sup>0</sup>), basic (B<sup>-</sup>), and acid (C<sup>+</sup> and D<sup>+</sup>) media considering the solvent effect (Aqueous Solutions,  $\epsilon=58.5$ , and refraction=1.33). Where  $\lambda_a$  is the theoretical absorption wavelength (nm),  $f$  is the oscillator strength, H (HOMO), L (LUMO) and A is the assignment of transitions.

| Systems               | CAM-B3LYP     |       |            |                 | B3LYP       |       |            |                 |
|-----------------------|---------------|-------|------------|-----------------|-------------|-------|------------|-----------------|
|                       | * $\lambda_a$ | $f$   | Active MOs | A               | $\lambda_a$ | $f$   | Active MOs | A               |
| <b>1A<sup>0</sup></b> | 398 (474)*    | 0.562 | H→L        | n→ $\pi^*$      | 527         | 0.342 | H→L        | n→ $\pi^*$      |
|                       | 292 (338)*    | 0.417 | H-2→L      | $\pi$ → $\pi^*$ | 383         | 0.464 | H-2→L      | $\pi$ → $\pi^*$ |
| <b>1B<sup>-</sup></b> | 427           | 0.899 | H→L        | n→ $\pi^*$      | 566         | 0.591 | H→L        | n→ $\pi^*$      |
|                       | 334           | 0.324 | H-2→L      | $\pi$ → $\pi^*$ | 370         | 0.464 | H→L+1      | n→ $\pi^*$      |
|                       | 307           | 0.139 | H→L+1      | n→ $\pi^*$      | 333         | 0.155 | H-1→L+1    | $\pi$ → $\pi^*$ |
| <b>1C<sup>+</sup></b> | 562           | 0.417 | H→L        | n→ $\pi^*$      | 689         | 0.193 | H→L        | n→ $\pi^*$      |
|                       | 445           | 0.400 | H-1→L      | $\pi$ → $\pi^*$ | 506         | 0.617 | H-2→L      | $\pi$ → $\pi^*$ |
|                       | 378           | 0.783 | H-2→L      | $\pi$ → $\pi^*$ | 404         | 0.466 | H→L+1      | $\pi$ → $\pi^*$ |
| <b>1D<sup>+</sup></b> | 344           | 0.675 | H→L        | n→ $\pi^*$      | 469         | 0.294 | H→L        | n→ $\pi^*$      |
|                       | 305           | 0.336 | H-1→L      | $\pi$ → $\pi^*$ | 406         | 0.336 | H-1→L      | $\pi$ → $\pi^*$ |
|                       | 286           | 0.145 | H-2→L      | $\pi$ → $\pi^*$ | 339         | 0.122 | H-2→L      | $\pi$ → $\pi^*$ |
| <b>2A<sup>0</sup></b> | 388 (466)*    | 0.584 | H→L        | n→ $\pi^*$      | 495         | 0.384 | H→L        | n→ $\pi^*$      |
|                       | 291 (338)*    | 0.265 | H-2→L      | $\pi$ → $\pi^*$ | 368         | 0.460 | H-3→L      | $\pi$ → $\pi^*$ |
| <b>2B<sup>-</sup></b> | 419           | 0.897 | H→L        | n→ $\pi^*$      | 567         | 0.593 | H→L        | n→ $\pi^*$      |
|                       | 332           | 0.348 | H-2→L      | $\pi$ → $\pi^*$ | 364         | 0.515 | H-2→L      | $\pi$ → $\pi^*$ |
|                       | 304           | 0.120 | H→L+1      | n→ $\pi^*$      | 334         | 0.100 | H→L+1      | n→ $\pi^*$      |
| <b>2C<sup>+</sup></b> | 549           | 0.383 | H→L        | n→ $\pi^*$      | 649         | 0.187 | H→L        | n→ $\pi^*$      |
|                       | 440           | 0.474 | H-1→L      | $\pi$ → $\pi^*$ | 542         | 0.575 | H-1→L      | $\pi$ → $\pi^*$ |
|                       | 383           | 0.672 | H-2→L      | $\pi$ → $\pi^*$ | 320         | 0.401 | H-1→L+1    | $\pi$ → $\pi^*$ |
| <b>2D<sup>+</sup></b> | 341           | 0.692 | H→L        | n→ $\pi^*$      | 447         | 0.333 | H→L        | n→ $\pi^*$      |
|                       | 306           | 0.364 | H-1→L      | $\pi$ → $\pi^*$ | 399         | 0.353 | H-1→L      | $\pi$ → $\pi^*$ |
|                       | 285           | 0.104 | H-2→L      | $\pi$ → $\pi^*$ | 334         | 0.131 | H→L+1      | $\pi$ → $\pi^*$ |

\*Experimental absorption wavelength.

**Table S7.** Singlet→Singlet emission data in compounds **1** and **2** in the neutral (**A**<sup>0</sup>), basic (**B**<sup>-</sup>), and acid (**C**<sup>+</sup> and **D**<sup>+</sup>) media considering the solvent effect (Aqueous Solutions,  $\epsilon=58.5$ , and refraction=1.33). Where  $\lambda_e$  is the theoretical emission wavelength (nm),  $f$  is the oscillator strength, A is the assignment of transitions,  $k_{rad}$ , and  $\tau_{rad}$  are the rate of radiative transfer ( $s^{-1}$ ) and radiative transfer lifetime (s), respectively.

| Systems                | CAM-B3LYP   |       |                |                      |                         | B3LYP       |       |                |                      |                         |
|------------------------|-------------|-------|----------------|----------------------|-------------------------|-------------|-------|----------------|----------------------|-------------------------|
|                        | $\lambda_e$ | $f$   | $k_{rad} 10^8$ | $\tau_{rad} 10^{-9}$ | A                       | $\lambda_e$ | $f$   | $k_{rad} 10^8$ | $\tau_{rad} 10^{-9}$ | A                       |
| <b>1A</b> <sup>0</sup> | 447         | 0.454 | 2.77           | 3.60                 | * $\pi \rightarrow \pi$ | 576         | 0.285 | 6.85           | 1.46                 | * $\pi \rightarrow \pi$ |
| <b>1B</b> <sup>-</sup> | 449         | 0.661 | 5.56           | 1.80                 | * $\pi \rightarrow \pi$ | 778         | 0.362 | 1.01           | 9.85                 | * $\pi \rightarrow \pi$ |
| <b>1C</b> <sup>+</sup> | 564         | 0.058 | 0.22           | 45.4                 | * $\pi \rightarrow \pi$ | 753         | 0.068 | 0.20           | 48.9                 | * $\pi \rightarrow \pi$ |
| <b>1D</b> <sup>+</sup> | 417         | 0.239 | 2.33           | 4.28                 | * $\pi \rightarrow \pi$ | 656         | 0.059 | 0.53           | 18.9                 | * $\pi \rightarrow \pi$ |
| <b>2A</b> <sup>0</sup> | 440         | 0.414 | 3.58           | 2.79                 | * $\pi \rightarrow \pi$ | 566         | 0.258 | 1.33           | 7.33                 | * $\pi \rightarrow \pi$ |
| <b>2B</b> <sup>-</sup> | 439         | 0.017 | 0.01           | 101.4                | * $\pi \rightarrow \pi$ | 500         | 0.013 | 0.08           | 117.9                | * $\pi \rightarrow \pi$ |
| <b>2C</b> <sup>+</sup> | 549         | 0.354 | 2.24           | 4.64                 | * $\pi \rightarrow \pi$ | 495         | 0.018 | 0.01           | 96.6                 | * $\pi \rightarrow \pi$ |
| <b>2D</b> <sup>+</sup> | 470         | 0.581 | 4.17           | 2.40                 | * $\pi \rightarrow \pi$ | 444         | 0.189 | 1.37           | 7.29                 | * $\pi \rightarrow \pi$ |

\*Experimental emission wavelength is 547 and 532 to **1** and **2**, respectively.

**Table S8.** Morokuma-Ziegler EDA for all systems in the neutral (**A**<sup>0</sup>), basic (**B**<sup>-</sup>), and acid (**C**<sup>+</sup> and **D**<sup>+</sup>) media. All values are in kcal mol<sup>-1</sup>.

| Molecule               | $\Delta E_{Int}$ | $\Delta E_{Pauli}$ | $\Delta E_{Disp}$ | $\Delta E_{Elec}$ | $\Delta E_{Orb}$ |
|------------------------|------------------|--------------------|-------------------|-------------------|------------------|
| <b>1A</b> <sup>0</sup> | -8901.7          | 25537.1            | -75.60 (0.2%)     | -6450.1 (15.8%)   | -34363.3 (84.0%) |
| <b>1B</b> <sup>-</sup> | -8856.1          | 25174.1            | -74.1 (0.2%)      | -6360.0 (15.7%)   | -33956.1 (84.1%) |
| <b>1C</b> <sup>+</sup> | -8846.8          | 32246.8            | -75.8 (0.2%)      | -6490.2 (15.8%)   | -34527.6 (84.0%) |
| <b>1D</b> <sup>+</sup> | -8853.2          | 32264.9            | -76.5 (0.2%)      | -6496.8 (15.8%)   | -34544.8 (84.0%) |
| <b>2A</b> <sup>0</sup> | -9034.0          | 35744.0            | -82.6 (0.2%)      | -7206.0 (16.1%)   | -37489.4 (83.7%) |
| <b>2B</b> <sup>-</sup> | -8994.4          | 35329.4            | -82.2 (0.2%)      | -7135.3 (16.1%)   | -37106.3 (83.7%) |
| <b>2C</b> <sup>+</sup> | -8980.2          | 36039.6            | -83.4 (0.2%)      | -7267.9 (16.1%)   | -37668.4 (83.7%) |
| <b>2D</b> <sup>+</sup> | -8986.4          | 36082.4            | -84.4 (0.2%)      | -7276.7 (16.1%)   | -37707.7 (83.7%) |

**Table S9.** Contours of the NOCV deformation density ( $\rho$ ) and the contribution of the interaction to the total orbital interaction ( $k$ ) are presented in kcal mol<sup>-1</sup> for all systems in the neutral (**A**<sup>0</sup>), basic (**B**<sup>-</sup>) and acid (**C**<sup>+</sup> and **D**<sup>+</sup>) media.

| Systems | <b>1A</b> <sup>0</sup> | <b>1B</b> <sup>-</sup> | <b>1C</b> <sup>+</sup> | <b>1D</b> <sup>+</sup> |
|---------|------------------------|------------------------|------------------------|------------------------|
| $k_I$   | -720.9                 | -729.2                 | -696.0                 | -699.0                 |
| $\rho$  |                        |                        |                        |                        |
| Systems | <b>1A</b> <sup>0</sup> | <b>1B</b> <sup>-</sup> | <b>1C</b> <sup>+</sup> | <b>2D</b> <sup>+</sup> |
| $k_I$   | -746.2                 | -778.5                 | -737.8                 | -711.3                 |
| $\rho$  |                        |                        |                        |                        |
